# Supplementary material for: Phylogenetic analysis of the CDGSH iron-sulfur binding domain reveals its ancient origin
Source: PubMed Central journal article supplement (PMC5859297; doi:10.1038/s41598-018-23305-6), 2018-03-19
Supplement: 41598_2018_23305_MOESM1_ESM.pdf [file 41598_2018_23305_MOESM1_ESM.pdf]

Supplementary Material for:

## **Phylogenetic analysis of the CDGSH iron-sulfur binding domain reveals its ancient origin**

Soham Sengupta<sup>1</sup>, Rachel Nechushtai<sup>2</sup>, Patricia A. Jennings<sup>3</sup>, Jose' N. Onuchic<sup>4</sup>, Pamela Padilla<sup>1</sup>, Rajeev K. Azad<sup>1,5</sup> and Ron Mittler<sup>1,\*</sup>

<sup>1</sup>Department of Biological Sciences, University of North Texas, Denton TX 76203, USA. <sup>2</sup>The Alexander Silberman Institute of Life Science, Hebrew University of Jerusalem, Edmond J. Safra Campus at Givat Ram, Jerusalem 91904, Israel. <sup>3</sup>Department of Chemistry & Biochemistry, University of California at San Diego, La Jolla, CA 92093, USA. <sup>4</sup>Center for Theoretical Biological Physics and Department of Physics, 239 Brockman Hall, 6100 Main Street- MS-61, Rice University, Houston, TX 77005, USA. <sup>5</sup>Department of Mathematics, University of North Texas, Denton, TX 76203, USA.

\* To whom correspondence should be addressed: ronmittler@gmail.com; Tel: 1-940-293-7170

**Supplementary Figure S1:** Maximum likelihood tree of archaeal CISD sequences generated using PhyML.

**Supplementary Figure S2:** Time-tree of archaea. The time of divergence of the archaeal organisms were obtained from the TimeTree.org. The domain organization for each organism was appended at the end using iTOL (<https://itol.embl.de/>).

**Supplementary Figure S3:** Maximum likelihood tree of bacterial CISD sequences generated using PhyML.

**Supplementary Figure S4:** Time-tree of bacteria. The time of divergence of the archaeal organisms were obtained from the TimeTree.org. The domain organization for each organism was appended at the end using iTOL (<https://itol.embl.de/>).

**Supplementary Figure S5:** Extended maximum likelihood tree of human CISD3, Archaea, and proteobacteria generated using PhyML tree.

**Supplementary Figure S6:** Maximum likelihood tree of human CISD3, archaea, and bacteria generated using PhyML.

**Supplementary Figure S7:** Extended maximum likelihood tree of human CISD2, archaea, and proteobacteria generated using PhyML.

**Supplementary Figure S8:** Maximum likelihood tree of human CISD2, archaea, and bacteria generated using PhyML.

**Supplementary Figure S9:** Extended time tree of divergence of eukaryotic CISD sequences generated using BEAST. The model was selected to be a combination of exponential population size model with a relaxed uncorrelated log-normal clock.

**Supplementary Figure S10:** Time tree of divergence of eukaryotic CISD sequences generated using BEAST. The model was selected to be a combination of constant population size model with a relaxed uncorrelated log-normal clock.

**Supplementary Figure S11:** Occurrence of the CDGSH, Fer4\_19 and Heme (catalase) domains in archaea. A time tree for all archaea classes was obtained from TimeTree.org. The presence or absence of the three domains within each class was determined using the *Dictyostelium* CISD (XP\_647247.1) (for CDGSH), the Fer4\_19 (PF06902), and the *Methanolacinia paynteri* (WP\_048151059.1) catalase sequence as the query sequence to perform PSIBLAST. Node ages are represented in billion years ago (BYA).

**Supplementary Figure S12:** Occurrence of the CDGSH, Fer4\_19 and Heme (catalase) domains in Bacteria. A time tree for all bacteria phylum was obtained from TimeTree.org. The presence or absence of the three domains within each class was determined using the *Dictyostelium* CISD (XP\_647247.1) (for CDGSH), the Fer4\_19 (PF06902), and the *Rufibacter ruber* (WP\_066836067.1) catalase sequences as the query sequence to perform PSI-BLAST. Node ages are represented in billion years ago (BYA).

**Supplementary Table S1:** List of bacterial CISD sequences

**Supplementary Table S2:** List of archaeal CISD sequences

**Supplementary Table S3:** BEAST model test table.

Supplementary Figure S1: Maximum likelihood tree of archaeal C1SD sequences generated using PhyML.

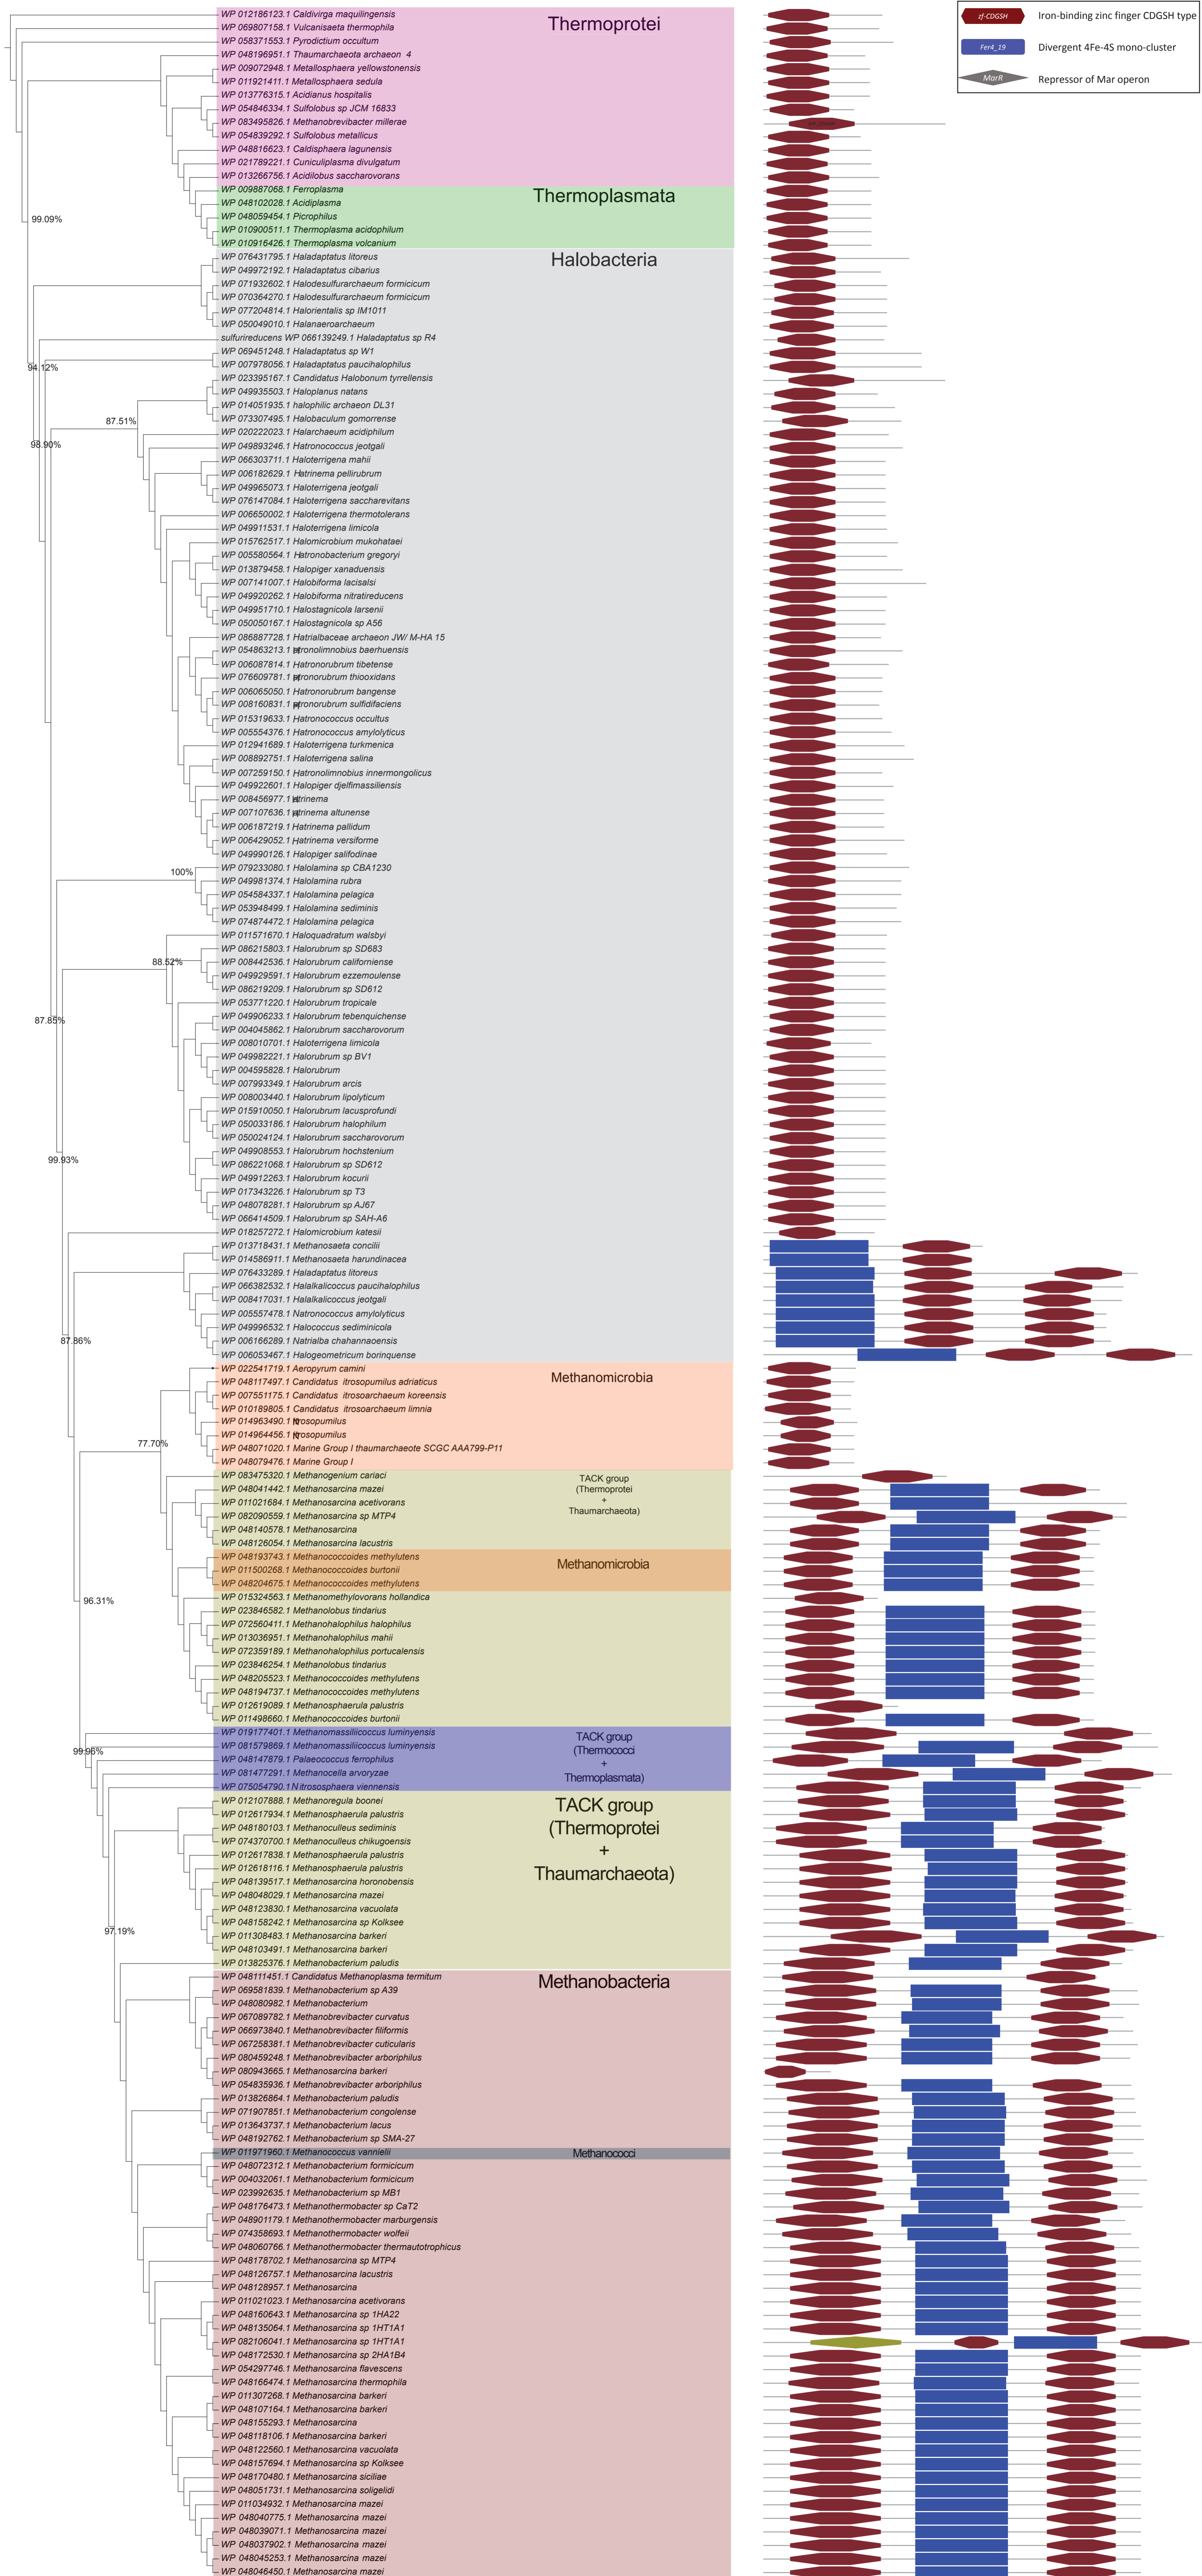

Tree scale: 100

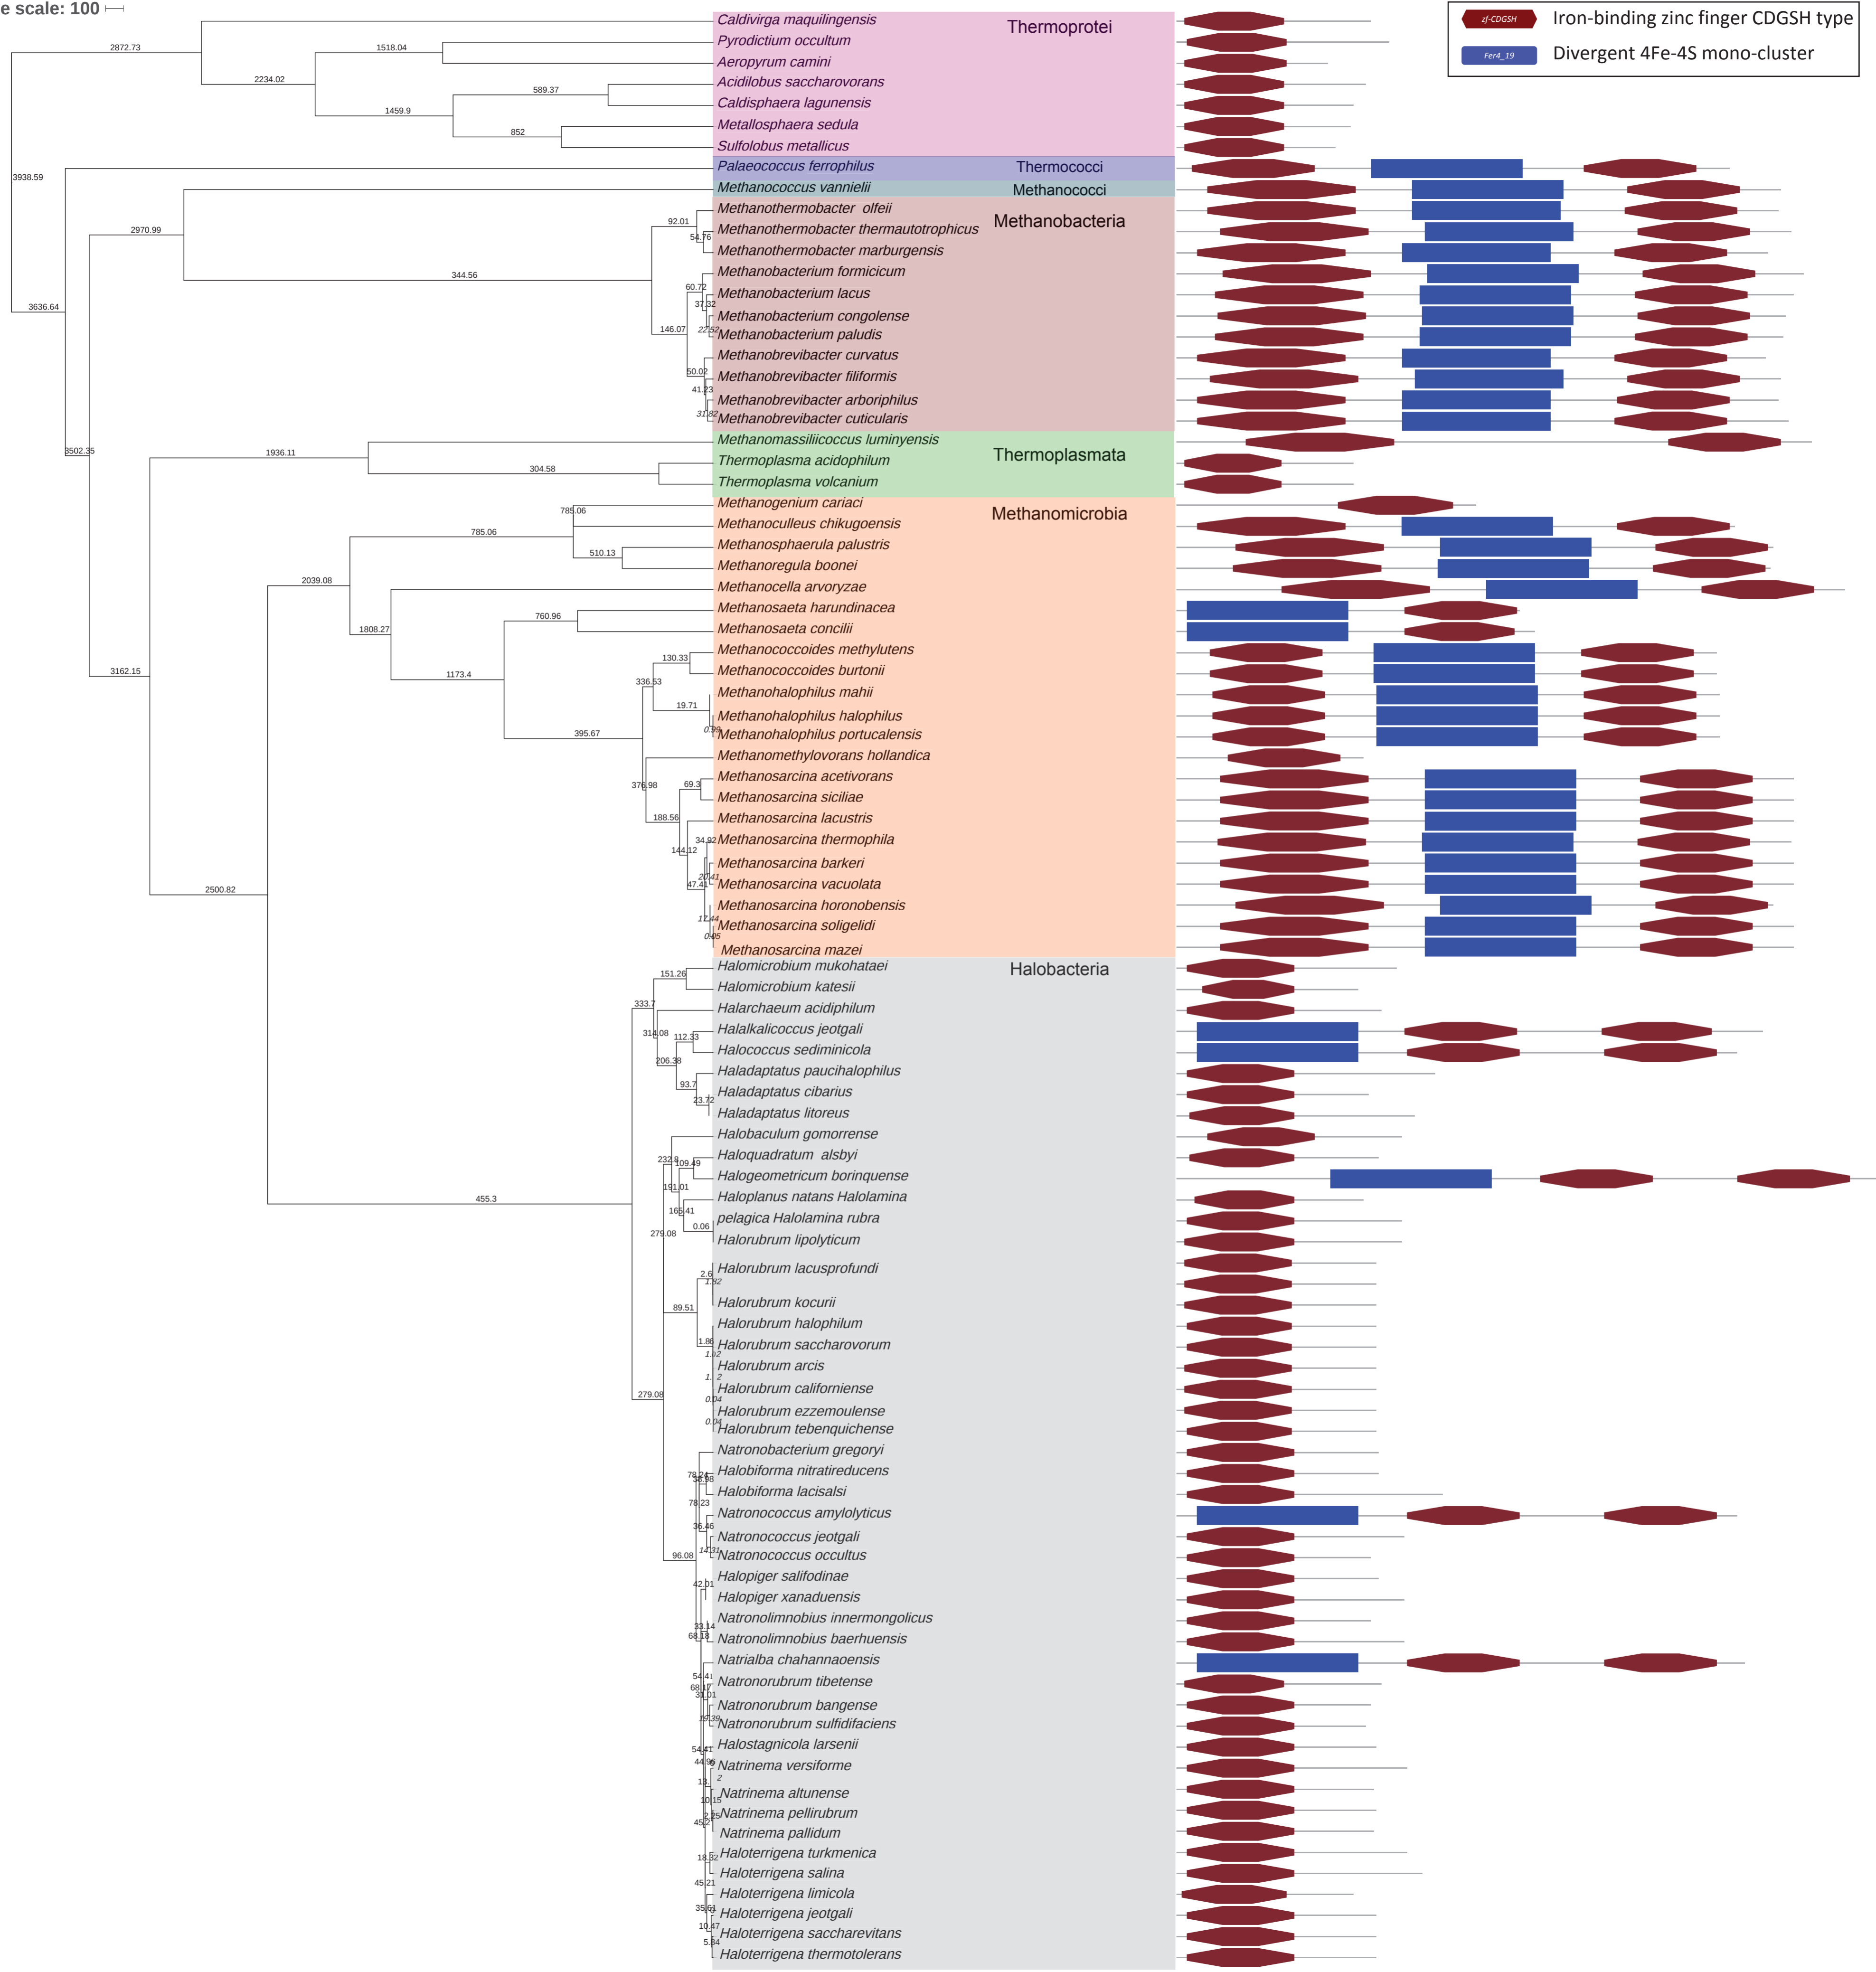

|                                                                                     |          |                                     |
|-------------------------------------------------------------------------------------|----------|-------------------------------------|
|   | zf-CDGSH | Iron-binding zinc finger CDGSH type |
|  | Fer4_19  | Divergent 4Fe-4S mono-cluster       |

- Caldivirga maquilingensis*
- Pyrodicticum occultum*
- Aeropyrum camini*
- Acidilobus saccharovorans*
- Caldisphaera lagunensis*
- Metallosphaera sedula*
- Sulfolobus metallicus*
- Palaeococcus ferophilus*
- Methanococcus vannielii*
- Methanothermobacter olfeii*
- Methanothermobacter thermautotrophicus*
- Methanothermobacter marburgensis*
- Methanobacterium formicicum*
- Methanobacterium lacus*
- Methanobacterium congolense*
- Methanobacterium paludis*
- Methanobrevibacter curvatus*
- Methanobrevibacter filiformis*
- Methanobrevibacter arboriphilus*
- Methanobrevibacter cuticularis*
- Methanomassiliicoccus luminyensis*
- Thermoplasma acidophilum*
- Thermoplasma volcanium*
- Methanogenium cariaci*
- Methanoculleus chikugoensis*
- Methanosphaerula palustris*
- Methanoregula boonei*
- Methanocella arvoryzae*
- Methanosaeta harundinacea*
- Methanosaeta concilii*
- Methanococcoides methylutens*
- Methanococcoides burtonii*
- Methanohalophilus mahii*
- Methanohalophilus halophilus*
- Methanohalophilus portucalensis*
- Methanomethylovorans hollandica*
- Methanosarcina acetivorans*
- Methanosarcina siciliae*
- Methanosarcina lacustris*
- Methanosarcina thermophila*
- Methanosarcina barkeri*
- Methanosarcina vacuolata*
- Methanosarcina horonobensis*
- Methanosarcina soligelidi*
- Methanosarcina mazei*
- Halomicrobium mukohataei*
- Halomicrobium katesii*
- Halarchaeum acidiphilum*
- Halalkalicoccus jeotgali*
- Halococcus sediminicola*
- Haladaptatus paucihalophilus*
- Haladaptatus cibaricus*
- Haladaptatus litoreus*
- Halobaculum gomorrense*
- Haloquadratum alsbyi*
- Halogeometricum borinquense*
- Haloplanus natans*
- Halolamina pelagica*
- Halolamina rubra*
- Halorubrum lipolyticum*
- Halorubrum lacusprofundi*
- Halorubrum kocurii*
- Halorubrum halophilum*
- Halorubrum saccharovororum*
- Halorubrum arcis*
- Halorubrum californiense*
- Halorubrum ezzemoulense*
- Halorubrum tebenquichense*
- Natronobacterium gregoryi*
- Halobiforma nitratireducens*
- Halobiforma lacisalsi*
- Natronococcus amylolyticus*
- Natronococcus jeotgali*
- Natronococcus occultus*
- Halopiger salifodinae*
- Halopiger xanaduensis*
- Natronolimnobius innermongolicus*
- Natronolimnobius baerhuensis*
- Natrialba chahannaensis*
- Natronorubrum tibetense*
- Natronorubrum bangense*
- Natronorubrum sulfidificiens*
- Halostagnicola larsenii*
- Natrinema versiforme*
- Natrinema altunense*
- Natrinema pellirubrum*
- Natrinema pallidum*
- Haloterrigena turkmenica*
- Haloterrigena salina*
- Haloterrigena limicola*
- Haloterrigena jeotgali*
- Haloterrigena saccharevitans*
- Haloterrigena thermotolerans*



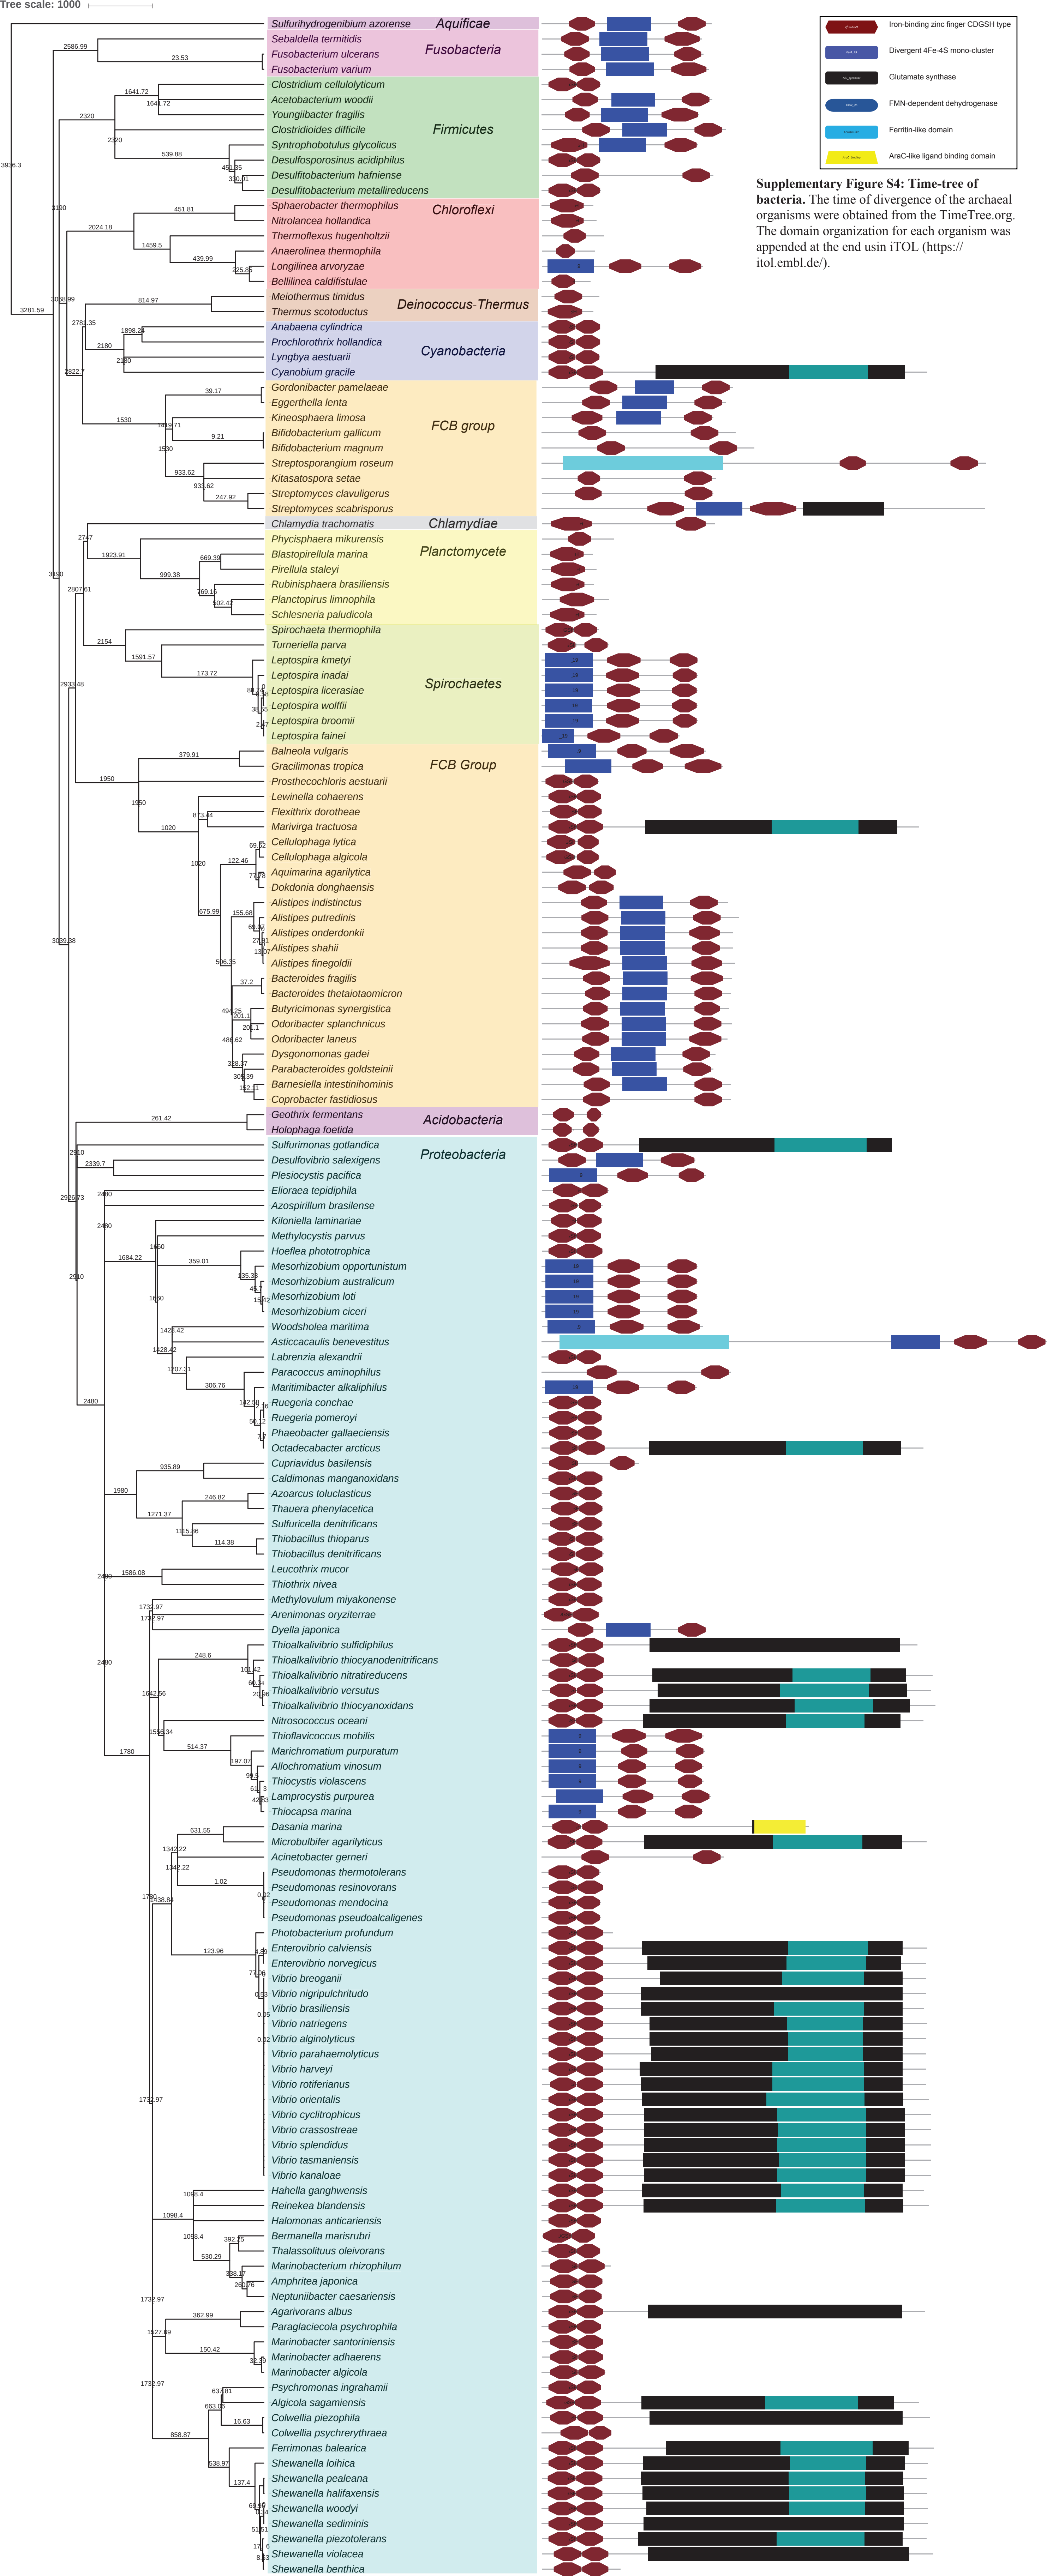



Supplementary Figure S6: Maximum likelihood tree of human CHD3, archaea, and bacteria generated using PhyML.

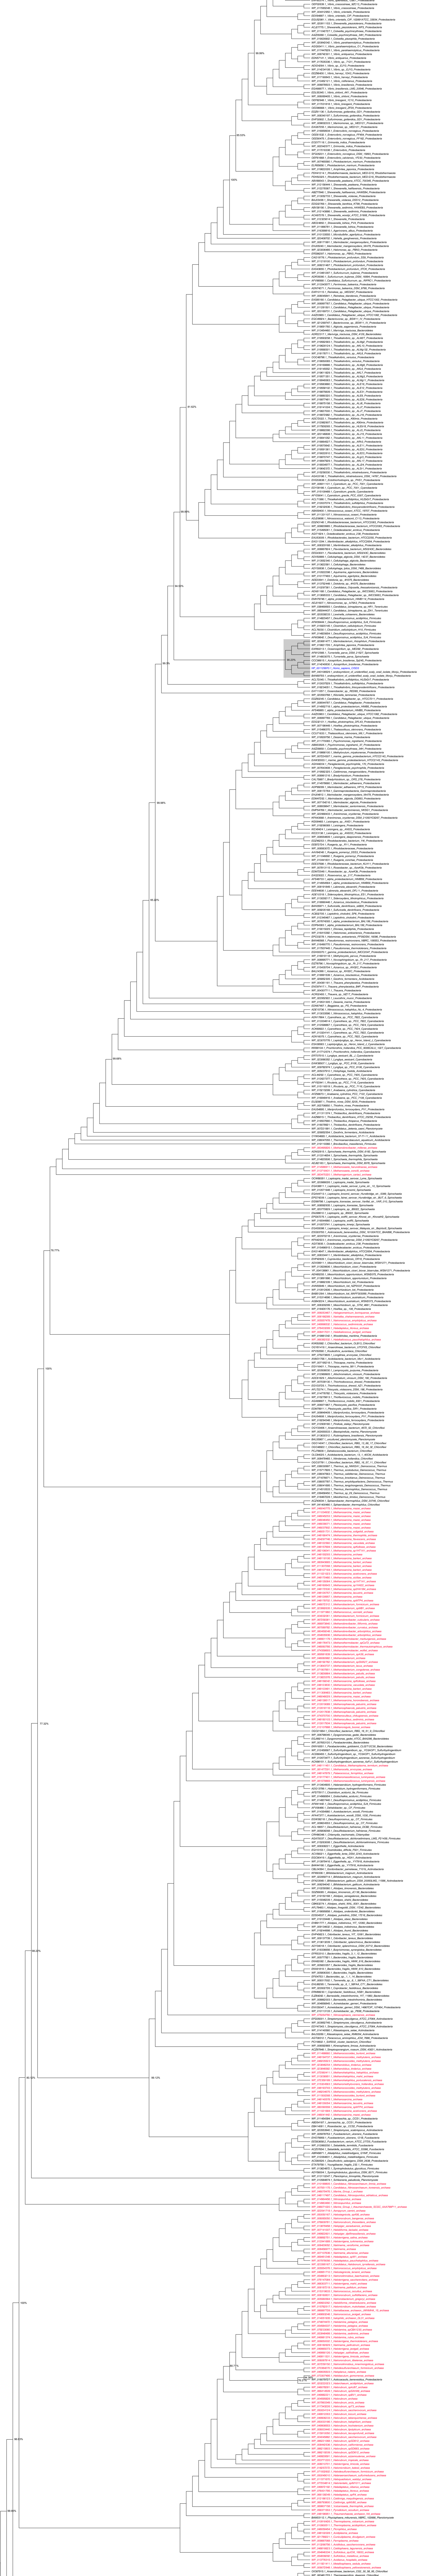





Supplementary Figure S8: Maximum likelihood tree of human CIS2D, archaea, and bacteria generated using PHYML.

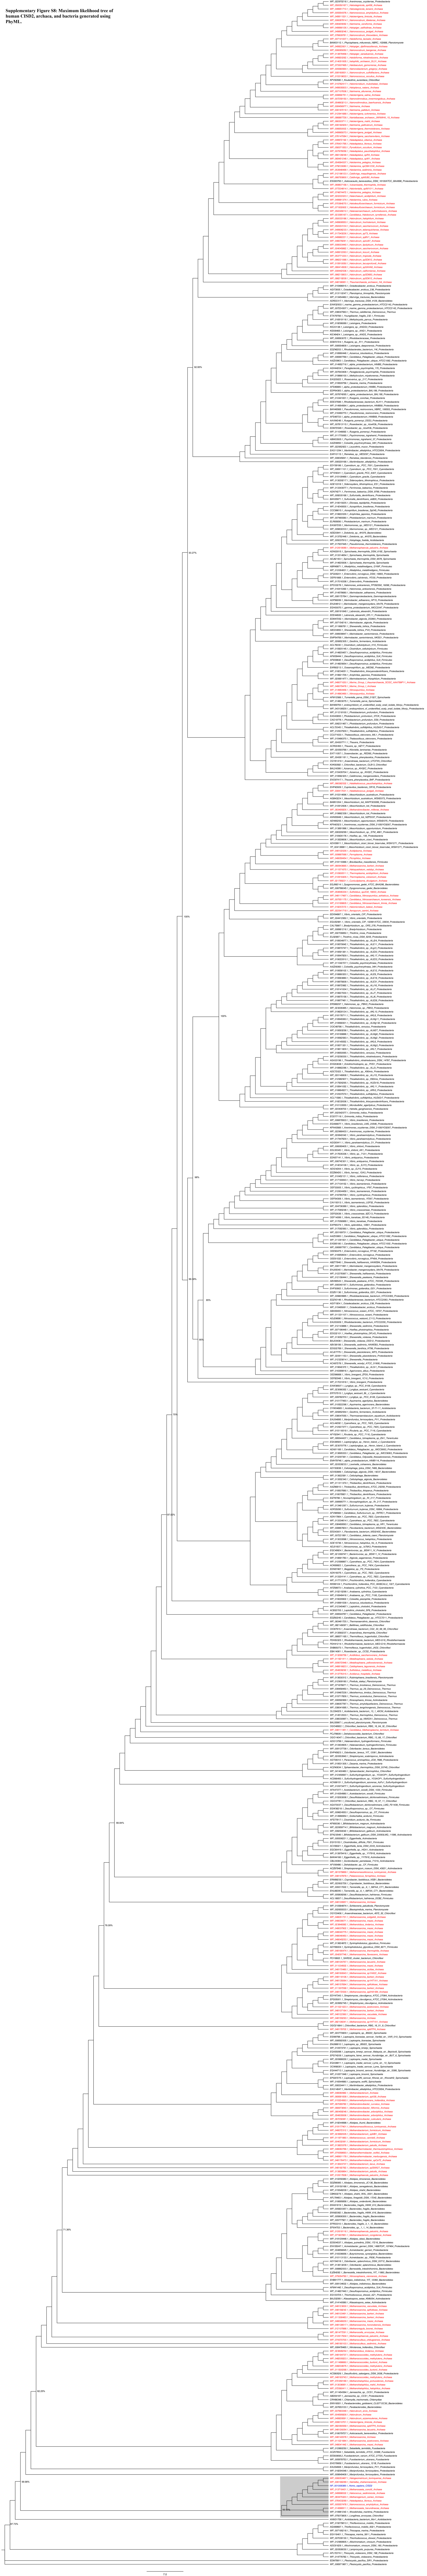

**Supplementary Figure S9: Extended time tree of divergence of eukaryotic C1SD sequences generated using BEAST.** The model was selected to be a combination of exponential population size model with a relaxed uncorrelated log-normal clock.

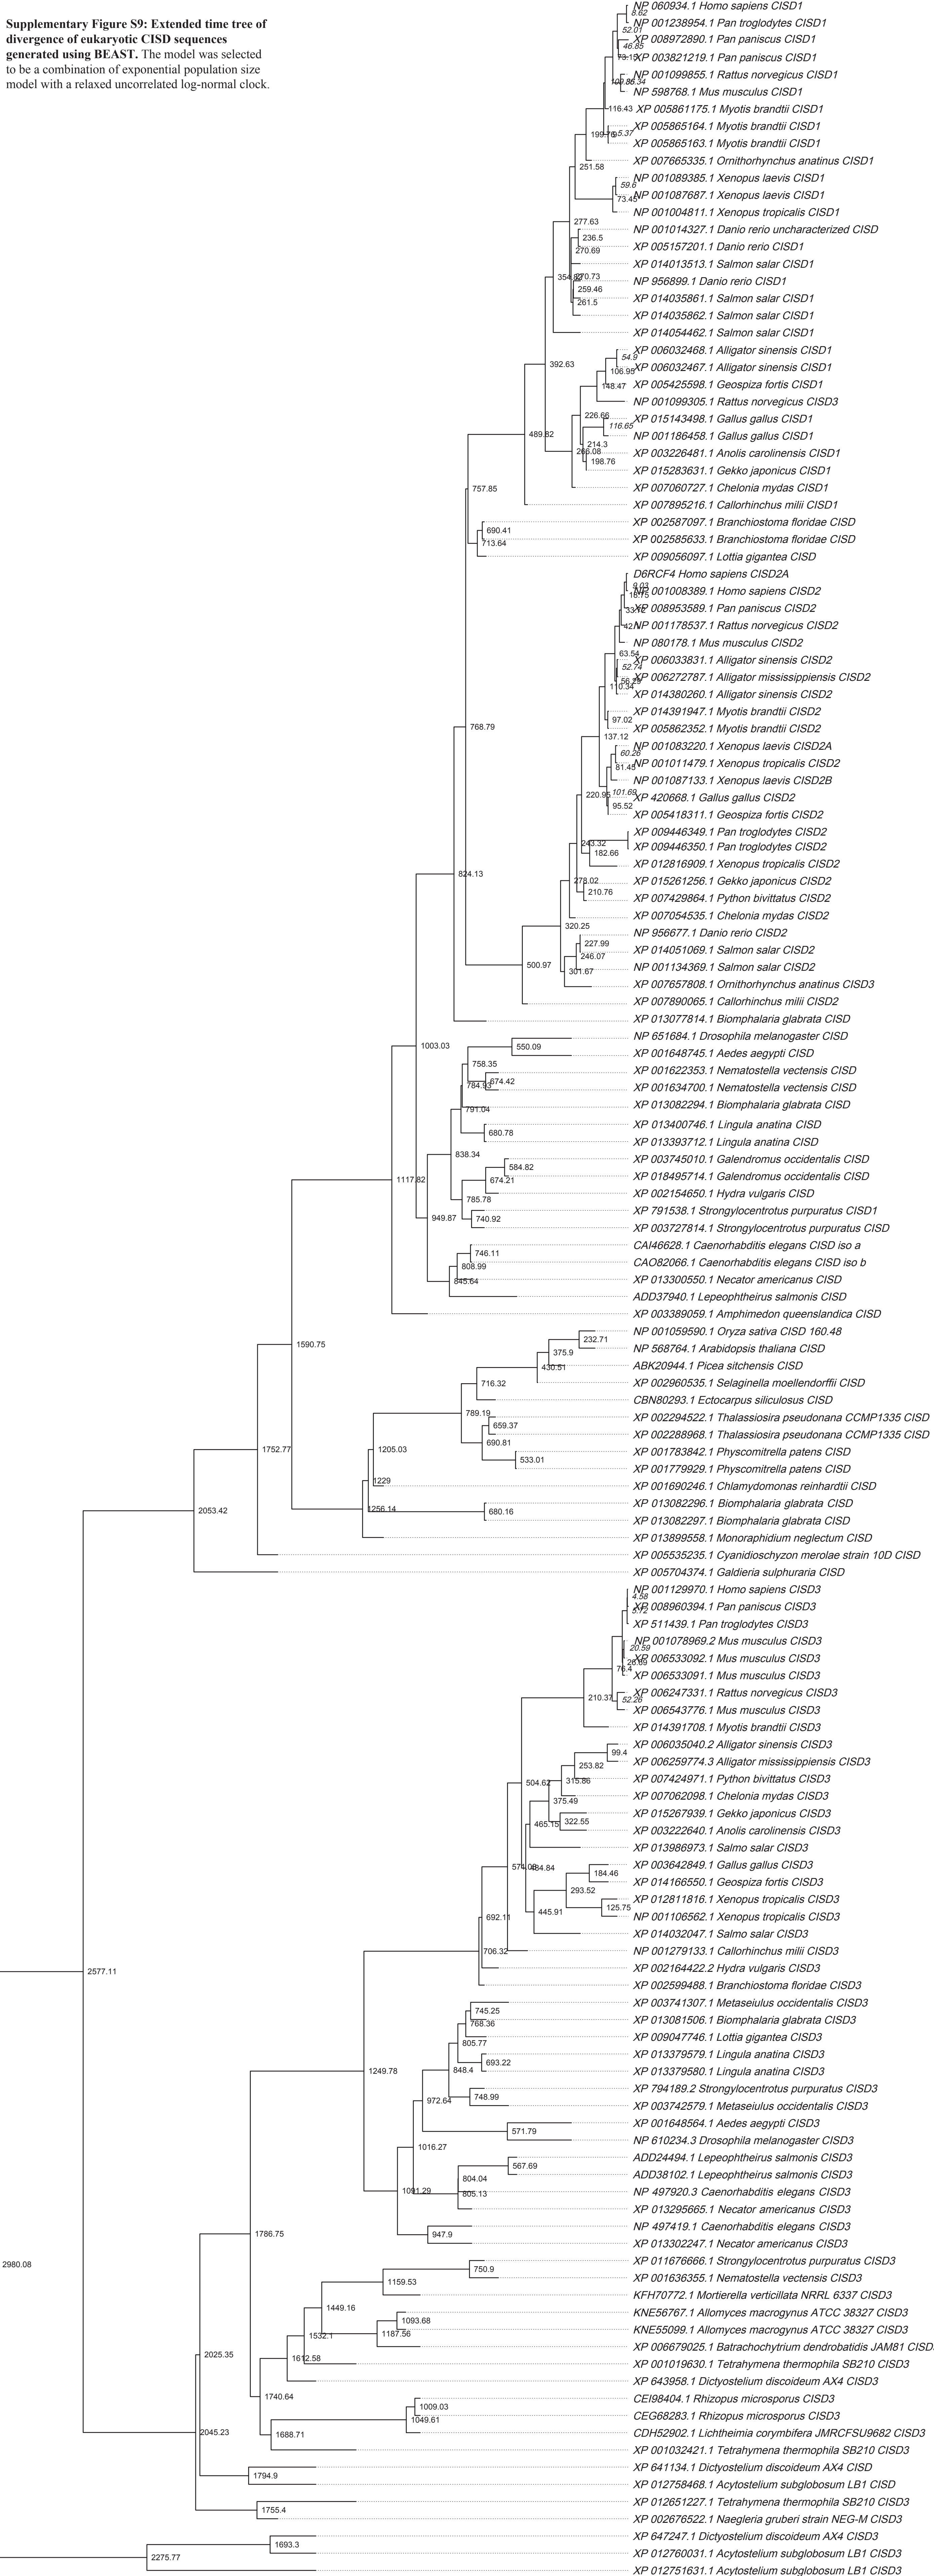

**Supplementary Figure S10: Time tree of divergence of eukaryotic C1SD sequences generated using BEAST.** The model was selected to be a combination of constant population size model with a relaxed uncorrelated log-normal clock.

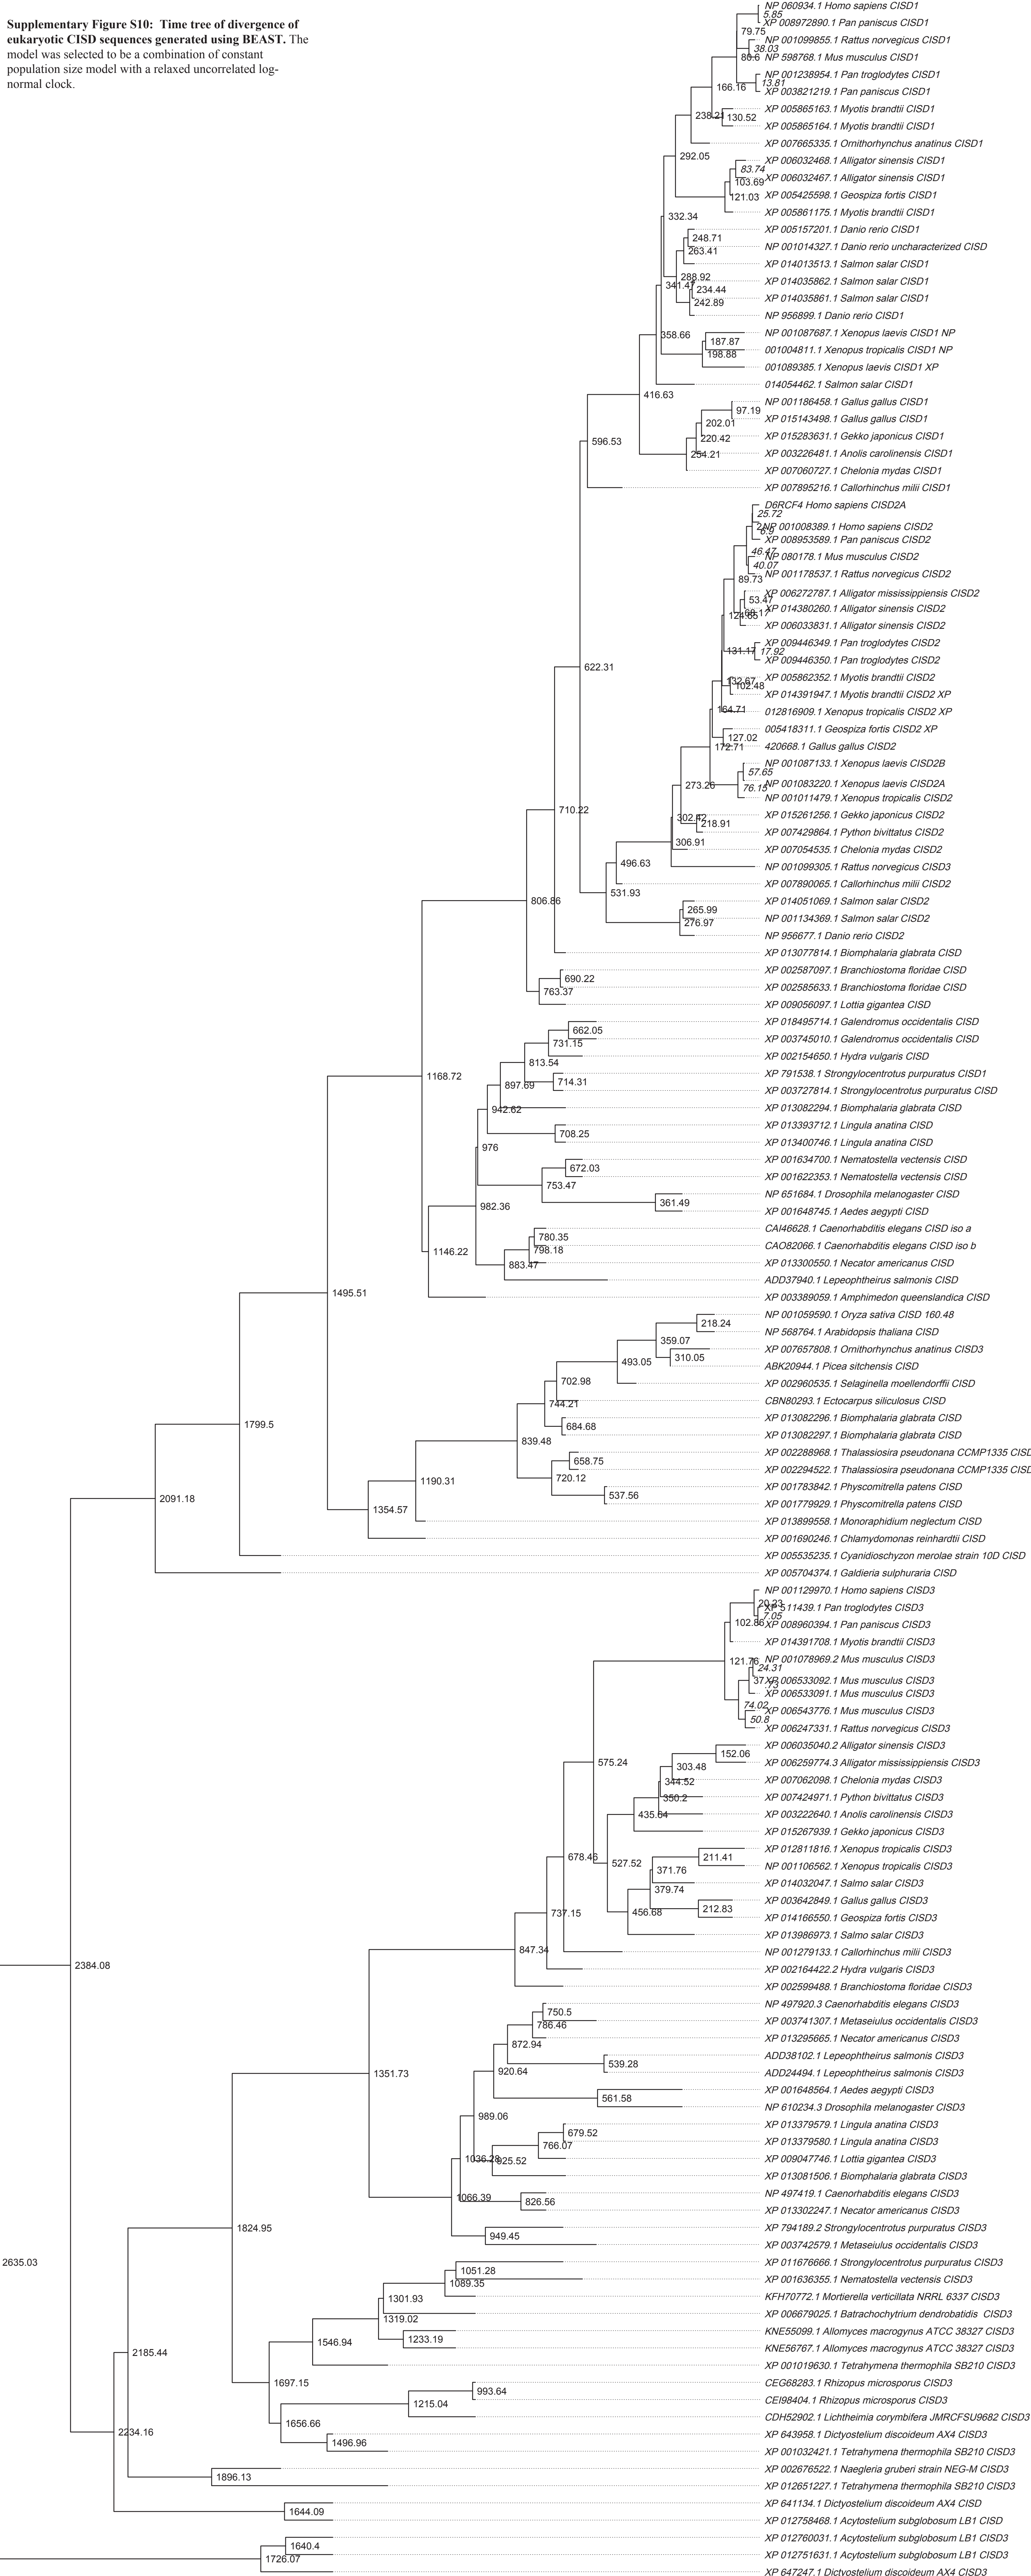

**Supplementary Figure S11:** Occurrence of the CDGSH, Fer4\_19 and Heme (catalase) domains in archaea.

|                        | CDGSH | Fer4_19 | Heme (Catalase) |
|------------------------|-------|---------|-----------------|
| <i>Methanomicrobia</i> | ✓     | ✓       | ✓               |
| 2.5                    |       |         |                 |
| <i>Halobacteria</i>    | ✓     | ✓       | ✓               |
| 2.8                    |       |         |                 |
| * <i>Archaeoglobi</i>  | ✗     | ✗       | ✗               |
| 3.2                    |       |         |                 |
| <i>Thermoplasmata</i>  | ✓     | ✗       | ✓               |
| 3.5                    |       |         |                 |
| <i>Methanobacteria</i> | ✓     | ✓       | ✓               |
| 2.9                    |       |         |                 |
| <i>Methanococci</i>    | ✓     | ✓       | ✗               |
| 3.3                    |       |         |                 |
| * <i>Methanopyri</i>   | ✗     | ✗       | ✗               |
| 3.6                    |       |         |                 |
| 4.1                    |       |         |                 |
| <i>Thermococci</i>     | ✓     | ✓       | ✗               |
| <i>Thermoprotei</i>    | ✓     | ✗       | ✗               |

**Supplementary Figure S12:** Occurrence of the CDGSH, Fer4\_19 and Heme (catalase) domains in Bacteria.

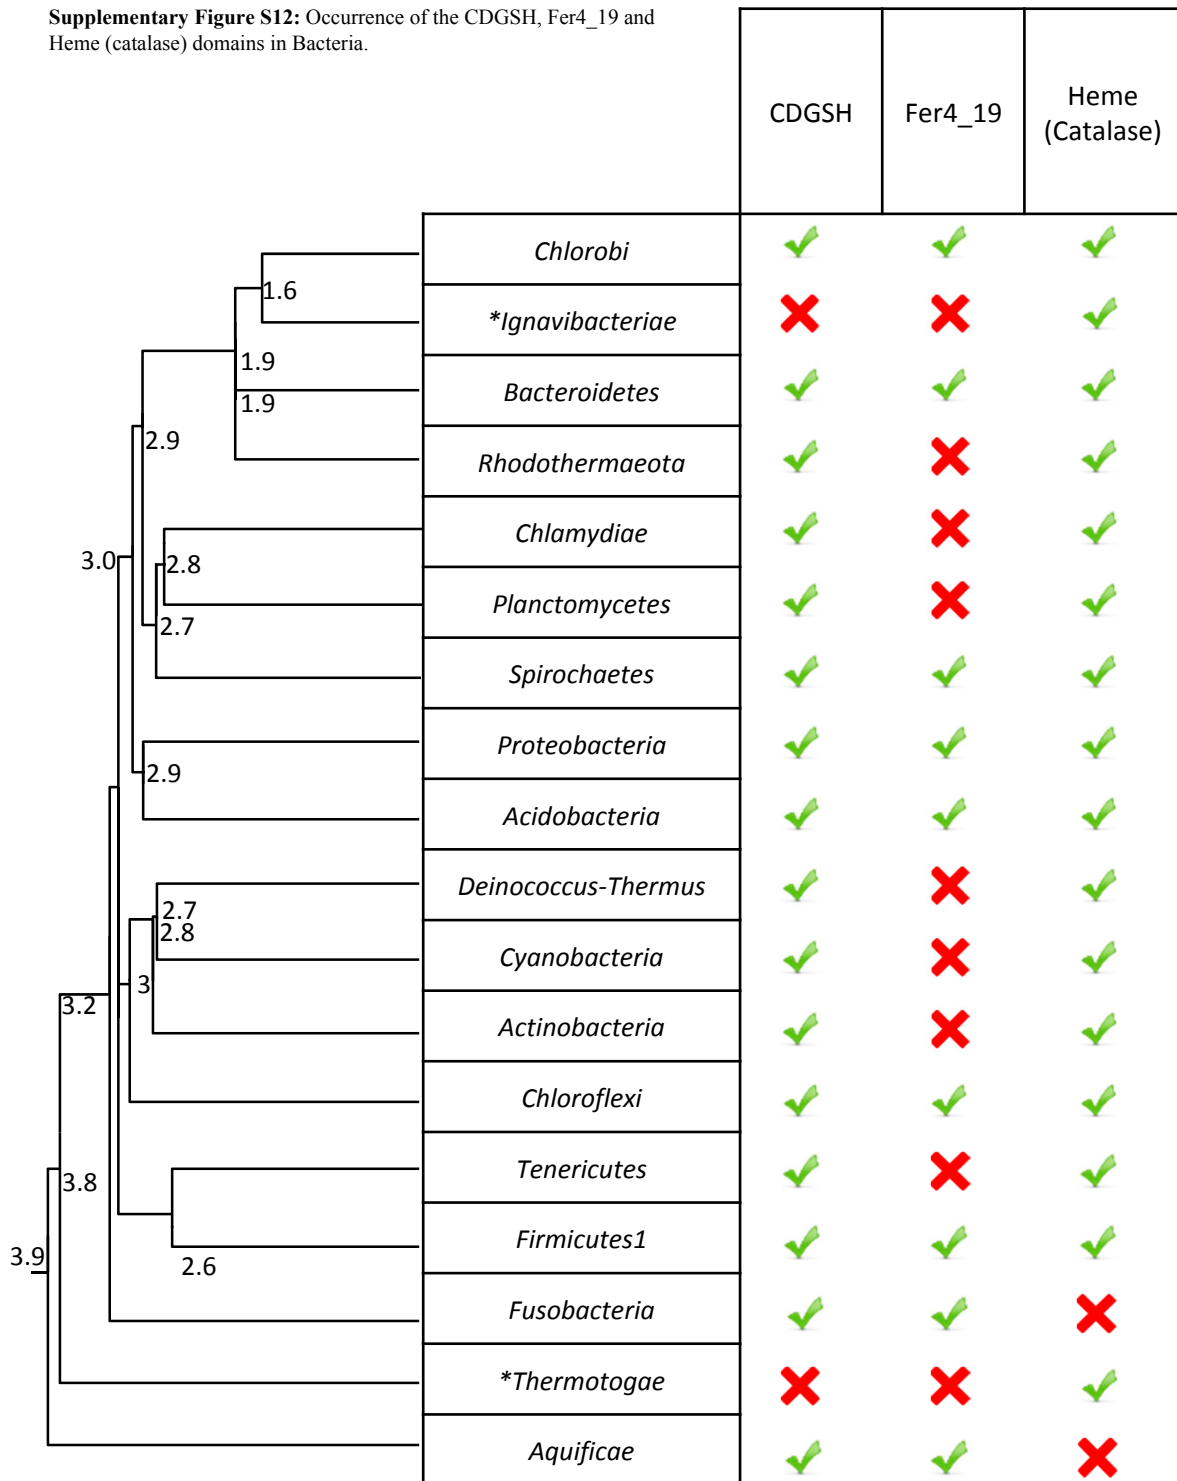

**Supplementary Table S1: List of bacterial CIRD sequences**

| <b>Bacterial CDGSH sequences</b> |                              |
|----------------------------------|------------------------------|
| <b>Accession no.</b>             | <b>Organism Name</b>         |
| AFA47377.1                       | Acetobacterium woodii        |
| WP_14354980.1                    | Acetobacterium woodii        |
| ANM31758.1                       | Acidobacteria bacterium      |
| OLC84025.1                       | Acidobacteria bacterium      |
| OYW04665.1                       | Acidobacteria bacterium      |
| ENV35047.1                       | Acinetobacter gernerii       |
| WP_4856845.1                     | Acinetobacter gernerii       |
| WP_10113133.1                    | Acinetobacter sp.            |
| WP_16399816.1                    | Agarivorans albus            |
| WP_18691760.1                    | Algicola sagamiensis         |
| AFL79483.1                       | Alistipes finegoldii         |
| WP_19244998.1                    | Alistipes ihumii             |
| EHB91777.1                       | Alistipes indistinctus       |
| WP_9134632.1                     | Alistipes indistinctus       |
| WP_19129448.1                    | Alistipes obesi              |
| WP_18695858.1                    | Alistipes onderdonkii        |
| EDS04537.1                       | Alistipes putredinis         |
| WP_19150168.1                    | Alistipes senegalensis       |
| CBK63274.1                       | Alistipes shahii             |
| WP_15546209.1                    | Alistipes shahii             |
| SDZ99085.1                       | Alistipes timonensis         |
| WP_10259380.1                    | Alistipes timonensis         |
| ABR49871.1                       | Alkaliphilus metalliredigens |
| WP_12064831.1                    | Alkaliphilus metalliredigens |
| ADC61629.1                       | Allochromatium vinosum       |
| WP_12969905.1                    | Allochromatium vinosum       |
| AFS46885.1                       | alpha proteobacterium        |
| AFS48733.1                       | alpha proteobacterium        |
| EDP64383.1                       | alpha proteobacterium        |
| EMH79746.1                       | alpha proteobacterium        |
| WP_7674265.1                     | alpha proteobacterium        |
| WP_14952718.1                    | alpha proteobacterium        |
| WP_14954564.1                    | alpha proteobacterium        |
| WP_19621726.1                    | Amphritea japonica           |
| WP_19622026.1                    | Amphritea japonica           |
| AFZ58673.1                       | Anabaena cylindrica          |
| WP_15215299.1                    | Anabaena cylindrica          |
| WP_16949416.1                    | Anabaena sp.                 |
| WP_13560237.1                    | Anaerolinea thermophila      |
| OQY33406.1                       | Anaerolineaceae bacterium    |
| OIO87915.1                       | Anaerolineae bacterium       |
| OQY81419.1                       | Anaerolineae bacterium       |
| WP_10177493.1                    | Aquimarina agarilytica       |
| WP_10522298.1                    | Aquimarina agarivorans       |

|               |                                      |
|---------------|--------------------------------------|
| KFN42523.1    | <i>Arenimonas oryzae</i>             |
| KFN43568.1    | <i>Arenimonas oryzae</i>             |
| WP_22968433.1 | <i>Arenimonas oryzae</i>             |
| WP_22970218.1 | <i>Arenimonas oryzae</i>             |
| ESQ93793.1    | <i>Asticcacaulis benevestitus</i>    |
| WP_18079727.1 | <i>Asticcacaulis benevestitus</i>    |
| BAL24399.1    | <i>Azoarcus</i> sp.                  |
| WP_15435704.1 | <i>Azoarcus</i> sp.                  |
| WP_18990446.1 | <i>Azoarcus toluclasticus</i>        |
| WP_18991539.1 | <i>Azoarcus toluclasticus</i>        |
| CCC98615.1    | <i>Azospirillum brasilense</i>       |
| WP_14240830.1 | <i>Azospirillum brasilense</i>       |
| EQC49924.1    | <i>Bacteriovorax</i> sp.             |
| WP_21269747.1 | <i>Bacteriovorax</i> sp.             |
| EFR53310.1    | <i>Bacteroides fragilis</i>          |
| EKA82082.1    | <i>Bacteroides fragilis</i>          |
| EKA91819.1    | <i>Bacteroides fragilis</i>          |
| WP_5777921.1  | <i>Bacteroides fragilis</i>          |
| WP_5806300.1  | <i>Bacteroides fragilis</i>          |
| WP_5820357.1  | <i>Bacteroides fragilis</i>          |
| EFI04753.1    | <i>Bacteroides</i> sp.               |
| EJZ64282.1    | <i>Barnesiella intestinihominis</i>  |
| WP_8862003.1  | <i>Barnesiella intestinihominis</i>  |
| EDN67467.1    | <i>Beggiatoa</i> sp.                 |
| WP_82149097.1 | <i>Bellilinea caldifistulae</i>      |
| EFA23548.1    | <i>Bifidobacterium gallicum</i>      |
| WP_6294042.1  | <i>Bifidobacterium gallicum</i>      |
| KFI69336.1    | <i>Bifidobacterium magnum</i>        |
| WP_22859714.1 | <i>Bifidobacterium magnum</i>        |
| WP_2655533.1  | <i>Blastopirellula marina</i>        |
| WP_8961216.1  | <i>Bradyrhizobium</i> Proteobacteria |
| CAL75887.1    | <i>Bradyrhizobium</i> sp.            |
| WP_19119366.1 | <i>Brevibacillus massiliensis</i>    |
| WP_18336656.1 | <i>Butyricimonas synergistica</i>    |
| WP_19562325.1 | <i>Caldimonas manganoxidans</i>      |
| WP_38469593.1 | Candidatus <i>Izimaplasma</i>        |
| WP_95544437.1 | Candidatus <i>Izimaplasma</i>        |
| WP_7221991.1  | Candidatus <i>Jettenia</i>           |
| WP_10297361.1 | Candidatus <i>Odyssella</i>          |
| AAZ20963.1    | Candidatus <i>Pelagibacter</i>       |
| AAZ20965.1    | Candidatus <i>Pelagibacter</i>       |
| AEA81168.1    | Candidatus <i>Pelagibacter</i>       |
| EAS85180.1    | Candidatus <i>Pelagibacter</i>       |
| EDZ60245.1    | Candidatus <i>Pelagibacter</i>       |
| WP_6997767.1  | Candidatus <i>Pelagibacter</i>       |
| WP_6997769.1  | Candidatus <i>Pelagibacter</i>       |
| WP_8544787.1  | Candidatus <i>Pelagibacter</i>       |



|               |                                      |
|---------------|--------------------------------------|
| WP_11281501.1 | Candidatus Pelagibacter              |
| WP_13695333.1 | Candidatus Pelagibacter              |
| WP_20169731.1 | Candidatus Pelagibacter              |
| AFV98568.1    | Candidatus Sulfuricurvum             |
| ADV50889.1    | Cellulophaga algicola                |
| WP_13552340.1 | Cellulophaga algicola                |
| WP_13622581.1 | Cellulophaga Bacteroidetes           |
| ADY30838.1    | Cellulophaga lytica                  |
| CRH86348.1    | Chlamydia trachomatis                |
| KXK50582.1    | Chloroflexi bacterium                |
| OGO14047.1    | Chloroflexi bacterium                |
| OGO21664.1    | Chloroflexi bacterium                |
| OGO37781.1    | Chloroflexi bacterium                |
| OGO48922.1    | Chloroflexi bacterium                |
| EQI15153.1    | Clostridioides difficile             |
| AFS77817.1    | Clostridium acidurici                |
| ACL76030.1    | Clostridium cellulolyticum           |
| WP_15925145.1 | Clostridium cellulolyticum           |
| WP_19026902.1 | Colwellia piezophila                 |
| AAZ26068.1    | Colwellia psychrerythraea            |
| AAZ28859.1    | Colwellia psychrerythraea            |
| WP_11042727.1 | Colwellia psychrerythraea            |
| ERM88230.1    | Coprobacter fastidiosus              |
| WP_22602726.1 | Coprobacter fastidiosus              |
| EHP42609.1    | Cupriavidus basilensis               |
| AFY29041.1    | Cyanobium gracile                    |
| WP_15109489.1 | Cyanobium gracile                    |
| EDY39186.1    | Cyanobium sp.                        |
| WP_6911101.1  | Cyanobium sp.                        |
| ACK69922.1    | Cyanothece sp.                       |
| ACL44292.1    | Cyanothece sp.                       |
| ADN16075.1    | Cyanothece sp.                       |
| ADN17864.1    | Cyanothece sp.                       |
| WP_12598867.1 | Cyanothece sp.                       |
| WP_12627377.1 | Cyanothece sp.                       |
| WP_13324141.1 | Cyanothece sp.                       |
| WP_13334614.1 | Cyanothece sp.                       |
| WP_19528756.1 | Dasania marina                       |
| WP_19531305.1 | Dasania marina                       |
| AFV06486.1    | Dehalobacter sp.                     |
| PCJ78609.1    | Dehalococcoidia bacterium            |
| AGA70037.1    | Desulfitobacterium dichloroeliminans |
| WP_15263008.1 | Desulfitobacterium dichloroeliminans |
| ACL18657.1    | Desulfitobacterium hafniense         |
| WP_5808268.1  | Desulfitobacterium hafniense         |
| AFM39444.1    | Desulfosporosinus acidiphilus        |
| AFM39642.1    | Desulfosporosinus acidiphilus        |

|               |                                         |
|---------------|-----------------------------------------|
| AFM41442.1    | Desulfosporosinus acidiphilus           |
| WP_14825457.1 | Desulfosporosinus acidiphilus           |
| WP_14825654.1 | Desulfosporosinus acidiphilus           |
| WP_14827440.1 | Desulfosporosinus acidiphilus           |
| EGW36218.1    | Desulfosporosinus sp.                   |
| WP_9624553.1  | Desulfosporosinus sp.                   |
| ACS80526.1    | Desulfovibrio salexigens                |
| AEE20941.1    | Dokdonia sp.                            |
| WP_13752448.1 | Dokdonia sp.                            |
| EGJ99214.1    | Dysgonomonas gadei                      |
| WP_6798045.1  | Dysgonomonas gadei                      |
| EHQ53638.1    | Ectothiorhodospira sp.                  |
| WP_9306221.1  | Eggerthella Actinobacteria              |
| ACV56021.1    | Eggerthella lenta                       |
| BAK44166.1    | Eggerthella sp.                         |
| EGC90419.1    | Eggerthella sp.                         |
| WP_13979416.1 | Eggerthella sp.                         |
| WP_19015025.1 | Elioraea tepidiphila                    |
| BAN69793.1    | endosymbiont of                         |
| WP_43108529.1 | endosymbiont of                         |
| OEF61668.1    | Enterovibrio calviensis                 |
| OEE61532.1    | Enterovibrio norvegicus                 |
| OEE90475.1    | Enterovibrio norvegicus                 |
| SFQ05201.1    | Enterovibrio norvegicus                 |
| WP_16959934.1 | Enterovibrio norvegicus                 |
| WP_17016338.1 | Enterovibrio Proteobacteria             |
| ADN74271.1    | Ferrimonas balearica                    |
| WP_13343577.1 | Ferrimonas balearica                    |
| EEG43001.1    | Flavobacteria bacterium                 |
| WP_8867824.1  | Flavobacteria bacterium                 |
| EHO79959.1    | Fusobacterium ulcerans                  |
| WP_5978753.1  | Fusobacterium ulcerans                  |
| EES63658.2    | Fusobacterium varium                    |
| EGH00070.1    | gamma proteobacterium                   |
| WP_8172764.1  | Gammaproteobacteria Gammaproteobacteria |
| WP_26852305.1 | Geothrix fermentans                     |
| WP_26852554.1 | Geothrix fermentans                     |
| CBL04394.1    | Gordonibacter pamelaee                  |
| WP_14966954.1 | Gottschalkia acidurici                  |
| EOD77118.1    | Grimontia indica                        |
| WP_2542577.1  | Grimontia indica                        |
| WP_20408702.1 | Hahella ganghwensis                     |
| ADQ13799.1    | Halanaerobium hydrogeniformans          |
| WP_13404905.1 | Halanaerobium hydrogeniformans          |
| EPC03278.1    | Halomonas anticariensis                 |
| WP_16415392.1 | Halomonas anticariensis                 |
| ERS86297.1    | Halomonas sp.                           |

|               |                           |
|---------------|---------------------------|
| WP_23006485.1 | Halomonas sp.             |
| EDQ32101.1    | Hoeflea phototrophica     |
| WP_7196449.1  | Hoeflea phototrophica     |
| WP_18426176.1 | Hoeflea sp.               |
| WP_5037910.1  | Holophaga foetida         |
| ABD54187.1    | Jannaschia sp.            |
| WP_11454394.1 | Jannaschia sp.            |
| WP_20593768.1 | Kiloniella laminariae     |
| WP_6592869.1  | Kineosphaera limosa       |
| BAJ33289.1    | Kitasatospora setae       |
| WP_14140580.1 | Kitasatospora setae       |
| KPV50590.1    | Kouleothrix aurantiaca    |
| EEE44608.1    | Labrenzia alexandrii      |
| WP_8191849.1  | Labrenzia alexandrii      |
| WP_20508030.1 | Lamprocystis purpurea     |
| WP_8554809.1  | Leisingera daeponensis    |
| WP_19296069.1 | Leisingera Proteobacteria |
| KIC23138.1    | Leisingera sp.            |
| KIC49424.1    | Leisingera sp.            |
| KID09465.1    | Leisingera sp.            |
| ESA38583.1    | Leptolyngbya sp.          |
| WP_23070776.1 | Leptolyngbya sp.          |
| EQA44713.1    | Leptospira broomii        |
| WP_10571948.1 | Leptospira broomii        |
| EPG74209.1    | Leptospira fainei         |
| EQA38811.1    | Leptospira inadai         |
| OCW88351.1    | Leptospira inadai         |
| WP_20988026.1 | Leptospira inadai         |
| EQA55098.1    | Leptospira kmetyi         |
| WP_10573741.1 | Leptospira kmetyi         |
| EID99798.1    | Leptospira licerasiae     |
| WP_8592935.1  | Leptospira licerasiae     |
| EMJ98610.1    | Leptospira sp.            |
| WP_20770829.1 | Leptospira sp.            |
| EPG67275.1    | Leptospira wolffii        |
| WP_16544980.1 | Leptospira wolffii        |
| ACB32705.1    | Leptothrix cholodnii      |
| WP_12345467.1 | Leptothrix cholodnii      |
| WP_22952922.1 | Leucothrix mucor          |
| WP_20539233.1 | Lewinella cohaerens       |
| WP_75073805.1 | Longilinea arvoryzae      |
| ERT07515.1    | Lyngbya aestuarii         |
| WP_23066352.1 | Lyngbya aestuarii         |
| EAW38507.1    | Lyngbya sp.               |
| WP_9782974.1  | Lyngbya sp.               |
| EAW32933.1    | marine gamma              |
| WP_7224307.1  | marine gamma              |

|               |                             |
|---------------|-----------------------------|
| ADP99289.1    | Marinobacter adhaerens      |
| WP_14578680.1 | Marinobacter adhaerens      |
| EDM47252.1    | Marinobacter algicola       |
| WP_7154216.1  | Marinobacter algicola       |
| EHJ04812.1    | Marinobacter manganoxydans  |
| EHJ05040.1    | Marinobacter manganoxydans  |
| WP_8171991.1  | Marinobacter manganoxydans  |
| EMP54769.1    | Marinobacter santoriniensis |
| WP_8939847.1  | Marinobacter santoriniensis |
| WP_20681477.1 | Marinobacterium rhizophilum |
| EAQ67255.1    | Marinomonas sp.             |
| WP_9832203.1  | Marinomonas sp.             |
| EAU54895.1    | Mariprofundus ferrooxydans  |
| EAU54908.1    | Mariprofundus ferrooxydans  |
| WP_9849409.1  | Mariprofundus ferrooxydans  |
| WP_18294348.1 | Mariprofundus ferrooxydans  |
| EAQ11294.1    | Maritimibacter alkaliphilus |
| EAQ14647.1    | Maritimibacter alkaliphilus |
| WP_8329168.1  | Maritimibacter alkaliphilus |
| WP_8334411.1  | Maritimibacter alkaliphilus |
| ADR22317.1    | Marivirga tractuosa         |
| WP_13454460.1 | Marivirga tractuosa         |
| WP_18467228.1 | Meiothermus timidus         |
| AGB43224.1    | Mesorhizobium australicum   |
| WP_15314696.1 | Mesorhizobium australicum   |
| ADV09911.1    | Mesorhizobium ciceri        |
| WP_13528606.1 | Mesorhizobium ciceri        |
| YP_4139961.1  | Mesorhizobium ciceri        |
| ANN55949.1    | Mesorhizobium loti          |
| BAB51264.1    | Mesorhizobium loti          |
| WP_10912606.1 | Mesorhizobium loti          |
| WP_19862339.1 | Mesorhizobium loti          |
| AEH85255.1    | Mesorhizobium opportunistum |
| WP_13891996.1 | Mesorhizobium opportunistum |
| WP_6326299.1  | Mesorhizobium sp.           |
| WP_16919118.1 | Methylocystis parvus        |
| WP_19866100.1 | Methylovulum miyakonense    |
| WP_10133555.1 | Microbulbifer agarilyticus  |
| WP_8478465.1  | Nitrolancea hollandica      |
| ADE15736.1    | Nitrosococcus halophilus    |
| WP_13033596.1 | Nitrosococcus halophilus    |
| ABA59400.1    | Nitrosococcus oceani        |
| WP_11331107.1 | Nitrosococcus oceani        |
| ADJ29698.1    | Nitrosococcus watsonii      |
| AEJ01607.1    | Nitrosomonas sp.            |
| EIZ78796.1    | Novosphingobium sp.         |
| WP_8995771.1  | Novosphingobium sp.         |

|               |                                 |
|---------------|---------------------------------|
| EAT11057.1    | Oceanobacter sp.                |
| EAR60213.1    | Oceanospirillum sp.             |
| AGI71924.1    | Octadecabacter arcticus         |
| AGI73935.1    | Octadecabacter arcticus         |
| WP_15495061.1 | Octadecabacter arcticus         |
| WP_15496915.1 | Octadecabacter arcticus         |
| EHP45623.1    | Odoribacter laneus              |
| WP_9137739.1  | Odoribacter laneus              |
| ADY34018.1    | Odoribacter splanchnicus        |
| WP_13613209.1 | Odoribacter splanchnicus        |
| WP_7653120.1  | Parabacteroides Bacteroidetes   |
| EKN16551.1    | Parabacteroides goldsteinii     |
| AGT08312.1    | Paracoccus aminophilus          |
| AGH44204.1    | Paraglaciecola psychrophila     |
| WP_7643408.1  | Paraglaciecola psychrophila     |
| ELR65656.1    | Photobacterium marinum          |
| WP_7465580.1  | Photobacterium marinum          |
| CAG19776.1    | Photobacterium profundum        |
| EAS43655.1    | Photobacterium profundum        |
| WP_6231467.1  | Photobacterium profundum        |
| WP_11218100.1 | Photobacterium profundum        |
| BAM03112.1    | Phycisphaera mikurensis         |
| WP_12909180.1 | Pirellula staleyi               |
| WP_13110247.1 | Planctopirus limnophila         |
| EDM78911.1    | Plesiocystis pacifica           |
| WP_6971967.1  | Plesiocystis pacifica           |
| KKI99104.1    | Prochlorothrix hollandica       |
| WP_17712574.1 | Prochlorothrix hollandica       |
| BAN46568.1    | Pseudomonas resinovorans        |
| WP_16490770.1 | Pseudomonas resinovorans        |
| WP_17937445.1 | Pseudomonas thermotolerans      |
| ABM03505.1    | Psychromonas ingrahamii         |
| WP_11770065.1 | Psychromonas ingrahamii         |
| WP_8045841.1  | Reinekea blandensis             |
| EAR10115.1    | Reinekea sp.                    |
| EDZ43148.1    | Rhodobacteraceae bacterium      |
| EEE37598.1    | Rhodobacteraceae bacterium      |
| WP_9829985.1  | Rhodobacteraceae bacterium      |
| WP_8563072.1  | Rhodobacteraceae Proteobacteria |
| EAU53009.1    | Rhodobacterales bacterium       |
| EDZ46253.1    | Rhodobacterales bacterium       |
| PDH41214.1    | Rhodothermaeota bacterium       |
| PDH50325.1    | Rhodothermaeota bacterium       |
| AFY52941.1    | Rivularia sp.                   |
| WP_15116519.1 | Rivularia sp.                   |
| EBA14061.1    | Roseobacter sp.                 |
| EDM72549.1    | Roseobacter sp.                 |

|               |                               |
|---------------|-------------------------------|
| WP_7813115.1  | Roseobacter sp.               |
| EAQ25022.1    | Roseovarius sp.               |
| WP_13630312.1 | Rubinisphaera brasiliensis    |
| WP_10441831.1 | Ruegeria conchae              |
| AAV94248.1    | Ruegeria pomeroyi             |
| WP_11046692.1 | Ruegeria pomeroyi             |
| EEB72724.1    | Ruegeria sp.                  |
| PCI18602.1    | SAR202 cluster                |
| WP_10584874.1 | Schlesneria paludicola        |
| ACZ07654.1    | Sebaldella termitidis         |
| WP_12860250.1 | Sebaldella termitidis         |
| EDQ02769.1    | Shewanella benthica           |
| ABZ77846.1    | Shewanella halifaxensis       |
| WP_12278367.1 | Shewanella halifaxensis       |
| ABO24850.1    | Shewanella loihica            |
| WP_11866781.1 | Shewanella loihica            |
| ABV88543.1    | Shewanella pealeana           |
| WP_12156444.1 | Shewanella pealeana           |
| ACJ27775.1    | Shewanella piezotolerans      |
| WP_20911153.1 | Shewanella piezotolerans      |
| WP_12325614.1 | Shewanella Proteobacteria     |
| ABV38156.1    | Shewanella sediminis          |
| WP_12143886.1 | Shewanella sediminis          |
| BAJ03438.1    | Shewanella violacea           |
| WP_13052733.1 | Shewanella violacea           |
| ACA87278.1    | Shewanella woodyi             |
| ADE10318.1    | Sideroxydans lithotrophicus   |
| WP_13028217.1 | Sideroxydans lithotrophicus   |
| ACZ40634.1    | Sphaerobacter thermophilus    |
| WP_41400480.1 | Sphaerobacter thermophilus    |
| ADN02815.1    | Spirochaeta thermophila       |
| AEJ62183.1    | Spirochaeta thermophila       |
| WP_13314654.1 | Spirochaeta thermophila       |
| WP_14625506.1 | Spirochaeta thermophila       |
| EDY47343.1    | Streptomyces clavuligerus     |
| EFG05001.1    | Streptomyces clavuligerus     |
| WP_3952745.1  | Streptomyces clavuligerus     |
| WP_20553940.1 | Streptomyces scabrisporus     |
| ACZ87948.1    | Streptosporangium roseum      |
| BAN35971.1    | Sulfuricella denitrificans    |
| WP_9205168.1  | Sulfuricella denitrificans    |
| ADR35090.1    | Sulfuricurvum kujiense        |
| WP_13461287.1 | Sulfuricurvum kujiense        |
| ACN98151.1    | Sulfurihydrogenibium azorense |
| WP_12673477.1 | Sulfurihydrogenibium azorense |
| ACD66493.1    | Sulfurihydrogenibium sp.      |
| WP_12459567.1 | Sulfurihydrogenibium sp.      |

|               |                                  |
|---------------|----------------------------------|
| EDZ61136.1    | Sulfurimonas gotlandica          |
| EHP30902.1    | Sulfurimonas gotlandica          |
| WP_8340197.1  | Sulfurimonas gotlandica          |
| ADY56004.1    | Syntrophobotulus glycolicus      |
| WP_13624872.1 | Syntrophobotulus glycolicus      |
| EHL88295.1    | Tannerella sp.                   |
| WP_9317002.1  | Tannerella sp.                   |
| CCU71633.1    | Thalassolituus oleivorans        |
| WP_15486370.1 | Thalassolituus oleivorans        |
| ENO97417.1    | Thauera phenylacetica            |
| WP_4361181.1  | Thauera phenylacetica            |
| WP_4307711.1  | Thauera Proteobacteria           |
| ACR02493.1    | Thauera sp.                      |
| WP_83461725.1 | Thermanaerotherix daxensis       |
| WP_38047055.1 | Thermoanaerobaculum aquaticum    |
| SNB65073.1    | Thermoflexus hugenholtzii        |
| WP_88571165.1 | Thermoflexus hugenholtzii        |
| WP_38057787.1 | Thermus amyloliquefaciens        |
| WP_71676671.1 | Thermus brockianus               |
| WP_38047563.1 | Thermus caliditerrae             |
| WP_15717826.1 | Thermus scotoductus              |
| WP_38030997.1 | Thermus sp                       |
| WP_39458450.1 | Thermus sp                       |
| WP_38041695.1 | Thermus tengchongensis           |
| WP_14510533.1 | Thermus thermophilus             |
| AGA33196.1    | Thioalkalivibrio nitratireducens |
| WP_15258330.1 | Thioalkalivibrio nitratireducens |
| ADC72022.1    | Thioalkalivibrio sp.             |
| WP_12982907.1 | Thioalkalivibrio sp.             |
| WP_17926265.1 | Thioalkalivibrio sp.             |
| WP_18141004.1 | Thioalkalivibrio sp.             |
| WP_18145552.1 | Thioalkalivibrio sp.             |
| WP_18169886.1 | Thioalkalivibrio sp.             |
| WP_18176711.1 | Thioalkalivibrio sp.             |
| WP_18862286.1 | Thioalkalivibrio sp.             |
| WP_18864527.1 | Thioalkalivibrio sp.             |
| WP_18870747.1 | Thioalkalivibrio sp.             |
| WP_18872982.1 | Thioalkalivibrio sp.             |
| WP_18875158.1 | Thioalkalivibrio sp.             |
| WP_18875609.1 | Thioalkalivibrio sp.             |
| WP_18877481.1 | Thioalkalivibrio sp.             |
| WP_18880320.1 | Thioalkalivibrio sp.             |
| WP_18934977.1 | Thioalkalivibrio sp.             |
| WP_18941052.1 | Thioalkalivibrio sp.             |
| WP_18947929.1 | Thioalkalivibrio sp.             |
| WP_18949363.1 | Thioalkalivibrio sp.             |
| WP_19022810.1 | Thioalkalivibrio sp.             |

|               |                                         |
|---------------|-----------------------------------------|
| WP_19558102.1 | Thioalkalivibrio sp.                    |
| WP_19562583.1 | Thioalkalivibrio sp.                    |
| WP_19568301.1 | Thioalkalivibrio sp.                    |
| WP_19570642.1 | Thioalkalivibrio sp.                    |
| WP_19571351.1 | Thioalkalivibrio sp.                    |
| WP_19583880.1 | Thioalkalivibrio sp.                    |
| WP_19591361.1 | Thioalkalivibrio sp.                    |
| WP_19593258.1 | Thioalkalivibrio sp.                    |
| WP_19611829.1 | Thioalkalivibrio sp.                    |
| WP_19627000.1 | Thioalkalivibrio sp.                    |
| WP_19628124.1 | Thioalkalivibrio sp.                    |
| WP_19642372.1 | Thioalkalivibrio sp.                    |
| WP_20146808.1 | Thioalkalivibrio sp.                    |
| ACL71586.1    | Thioalkalivibrio sulfidophilus          |
| ACL72045.1    | Thioalkalivibrio sulfidophilus          |
| WP_12637074.1 | Thioalkalivibrio sulfidophilus          |
| WP_12637529.1 | Thioalkalivibrio sulfidophilus          |
| WP_18232636.1 | Thioalkalivibrio thiocyanodenitrificans |
| WP_18234051.1 | Thioalkalivibrio thiocyanodenitrificans |
| OOC48798.1    | Thioalkalivibrio versutus               |
| WP_18650065.1 | Thioalkalivibrio versutus               |
| AAZ96815.1    | Thiobacillus denitrificans              |
| WP_11311374.1 | Thiobacillus denitrificans              |
| WP_18078921.1 | Thiobacillus denitrificans              |
| WP_18507680.1 | Thiobacillus thioparus                  |
| EGV16401.1    | Thiocapsa marina                        |
| WP_7195218.1  | Thiocapsa marina                        |
| AFL72274.1    | Thiocystis violascens                   |
| WP_14776782.1 | Thiocystis violascens                   |
| AGA89667.1    | Thioflavicoccus mobilis                 |
| WP_15279813.1 | Thioflavicoccus mobilis                 |
| EGV33725.1    | Thiorhodococcus drewsii                 |
| WP_7039130.1  | Thiorhodococcus drewsii                 |
| EIJ32887.1    | Thiothrix nivea                         |
| WP_2706850.1  | Thiothrix nivea                         |
| AFM12566.1    | Turneriella parva                       |
| WP_14803075.1 | Turneriella parva                       |
| BAL55967.1    | uncultured planctomycete                |
| EDN57141.1    | Vibrio antiquarius                      |
| WP_6742301.1  | Vibrio antiquarius                      |
| EGA66677.1    | Vibrio brasiliensis                     |
| WP_6878503.1  | Vibrio brasiliensis                     |
| OED96668.1    | Vibrio breoganii                        |
| OEF82948.1    | Vibrio breoganii                        |
| WP_17031818.1 | Vibrio breoganii                        |
| OEF02639.1    | Vibrio crassostreae                     |
| WP_17065248.1 | Vibrio crassostreae                     |



|               |                                |
|---------------|--------------------------------|
| OEF33005.1    | <i>Vibrio cyclitrophicus</i>   |
| WP_16785709.1 | <i>Vibrio cyclitrophicus</i>   |
| EEZ86426.1    | <i>Vibrio harveyi</i>          |
| WP_17190843.1 | <i>Vibrio harveyi</i>          |
| OEF14099.1    | <i>Vibrio kanaloae</i>         |
| WP_17056989.1 | <i>Vibrio kanaloae</i>         |
| EEX94887.1    | <i>Vibrio orientalis</i>       |
| EGU52981.1    | <i>Vibrio orientalis</i>       |
| WP_4412950.1  | <i>Vibrio orientalis</i>       |
| AGQ93411.1    | <i>Vibrio parahaemolyticus</i> |
| WP_17447629.1 | <i>Vibrio parahaemolyticus</i> |
| WP_20842042.1 | <i>Vibrio parahaemolyticus</i> |
| WP_10452121.1 | <i>Vibrio rotiferianus</i>     |
| EDL55345.1    | <i>Vibrio shilonii</i>         |
| WP_6069405.1  | <i>Vibrio shilonii</i>         |
| AEX24264.1    | <i>Vibrio</i> sp.              |
| WP_14234108.1 | <i>Vibrio</i> sp.              |
| WP_17635336.1 | <i>Vibrio</i> sp.              |
| EAP95374.1    | <i>Vibrio splendidus</i>       |
| WP_4736389.1  | <i>Vibrio splendidus</i>       |
| WP_17092560.1 | <i>Vibrio splendidus</i>       |
| CAV19313.1    | <i>Vibrio tasmaniensis</i>     |
| OEF54308.1    | <i>Vibrio tasmaniensis</i>     |
| WP_12604459.1 | <i>Vibrio tasmaniensis</i>     |
| WP_17104152.1 | <i>Vibrio tasmaniensis</i>     |
| WP_19961242.1 | <i>Woodsholea maritima</i>     |
| ETA79758.1    | <i>Youngiibacter fragilis</i>  |

**Supplementary Table S2: List of archaeal CISD sequences**

| <b>Archaeal CDGSH sequences</b> |                                      |
|---------------------------------|--------------------------------------|
| <b>Accession no.</b>            | <b>Organism Name</b>                 |
| WP_013776315.1                  | Acidianus hospitalis                 |
| WP_013266756.1                  | Acidilobus saccharovorans            |
| WP_048102028.1                  | Acidiplasma                          |
| WP_022541719.1                  | Aeropyrum camini                     |
| WP_048816623.1                  | Caldisphaera lagunensis              |
| WP_012186123.1                  | Caldivirga maquilingensis            |
| WP_066793800.1                  | Caldivirga sp MU80                   |
| WP_023395167.1                  | Candidatus Halobonum tyrrellensis    |
| WP_048111451.1                  | Candidatus Methanoplasma termitum    |
| WP_007551175.1                  | Candidatus Nitrosoarchaeum koreensis |
| WP_010189805.1                  | Candidatus Nitrosoarchaeum limnia    |
| WP_048117497.1                  | Candidatus Nitrosopumilus adriaticus |
| WP_021789221.1                  | Cuniculiplasma divulgatum            |
| WP_009887068.1                  | Ferroplasma                          |
| WP_049972192.1                  | Haladaptatus cibarius                |
| WP_076431795.1                  | Haladaptatus litoreus                |
| WP_076433289.1                  | Haladaptatus litoreus                |
| WP_007978056.1                  | Haladaptatus paucihalophilus         |
| WP_066139249.1                  | Haladaptatus sp R4                   |
| WP_069451248.1                  | Haladaptatus sp W1                   |
| WP_008417031.1                  | Halalkalicoccus jeotgali             |
| WP_066382532.1                  | Halalkalicoccus paucihalophilus      |
| WP_050049010.1                  | Halanaeroarchaeum sulfurireducens    |
| WP_020222023.1                  | Halarchaeum acidiphilum              |
| WP_073307495.1                  | Halobaculum gomorrense               |
| WP_007141007.1                  | Halobiforma lacisalsi                |
| WP_049920262.1                  | Halobiforma nitratireducens          |
| WP_049996532.1                  | Halococcus sediminicola              |
| WP_071932602.1                  | Halodesulfurarchaeum formicum        |
| WP_070364270.1                  | Halodesulfurarchaeum formicum        |
| WP_006053467.1                  | Halogeometricum borinquense          |
| WP_074874472.1                  | Halolamina pelagica                  |
| WP_054584337.1                  | Halolamina pelagica                  |
| WP_049981374.1                  | Halolamina rubra                     |
| WP_053948499.1                  | Halolamina sediminis                 |
| WP_079233080.1                  | Halolamina sp CBA1230                |
| WP_018257272.1                  | Halomicrobium katesii                |
| WP_015762517.1                  | Halomicrobium mukohataei             |
| WP_014051935.1                  | halophilic archaeon DL31             |
| WP_049922601.1                  | Halopiger djelfimassiliensis         |
| WP_049990126.1                  | Halopiger salifodinae                |
| WP_013879458.1                  | Halopiger xanaduensis                |
| WP_049935503.1                  | Haloplanus natans                    |
| WP_011571670.1                  | Haloquadratum walsbyi                |

|                |                                               |
|----------------|-----------------------------------------------|
| WP_077204814.1 | Halorientalis sp IM1011                       |
| WP_004595828.1 | Halorubrum                                    |
| WP_007993349.1 | Halorubrum arcis                              |
| WP_008442536.1 | Halorubrum californiense                      |
| WP_049929591.1 | Halorubrum ezzemoulense                       |
| WP_050033186.1 | Halorubrum halophilum                         |
| WP_049908553.1 | Halorubrum hochstenium                        |
| WP_049912263.1 | Halorubrum kocurii                            |
| WP_015910050.1 | Halorubrum lacusprofundi                      |
| WP_008003440.1 | Halorubrum lipolyticum                        |
| WP_050024124.1 | Halorubrum saccharovorum                      |
| WP_004045862.1 | Halorubrum saccharovorum                      |
| WP_048078281.1 | Halorubrum sp AJ67                            |
| WP_049982221.1 | Halorubrum sp BV1                             |
| WP_066414509.1 | Halorubrum sp SAH-A6                          |
| WP_086219209.1 | Halorubrum sp SD612                           |
| WP_086221068.1 | Halorubrum sp SD612                           |
| WP_086215803.1 | Halorubrum sp SD683                           |
| WP_017343226.1 | Halorubrum sp T3                              |
| WP_049906233.1 | Halorubrum tebenquichense                     |
| WP_053771220.1 | Halorubrum tropicale                          |
| WP_049951710.1 | Halostagnicola larsenii                       |
| WP_050050167.1 | Halostagnicola sp A56                         |
| WP_049965073.1 | Haloterrigena jeotgali                        |
| WP_008010701.1 | Haloterrigena limicola                        |
| WP_049911531.1 | Haloterrigena limicola                        |
| WP_066303711.1 | Haloterrigena mahii                           |
| WP_076147084.1 | Haloterrigena saccharevitans                  |
| WP_008892751.1 | Haloterrigena salina                          |
| WP_006650002.1 | Haloterrigena thermotolerans                  |
| WP_012941689.1 | Haloterrigena turkmenica                      |
| WP_048079476.1 | Marine Group I                                |
| WP_048071020.1 | Marine Group I thaumarchaeote SCGC AAA799-P11 |
| WP_011921411.1 | Metallosphaera sedula                         |
| WP_009072948.1 | Metallosphaera yellowstonensis                |
| WP_048080982.1 | Methanobacterium                              |
| WP_071907851.1 | Methanobacterium congolense                   |
| WP_004032061.1 | Methanobacterium formicicum                   |
| WP_048072312.1 | Methanobacterium formicicum                   |
| WP_013643737.1 | Methanobacterium lacus                        |
| WP_013826864.1 | Methanobacterium paludis                      |
| WP_013825376.1 | Methanobacterium paludis                      |
| WP_069581839.1 | Methanobacterium sp A39                       |
| WP_023992635.1 | Methanobacterium sp MB1                       |
| WP_048192762.1 | Methanobacterium sp SMA-27                    |
| WP_054835936.1 | Methanobrevibacter arboriphilus               |
| WP_080459248.1 | Methanobrevibacter arboriphilus               |

|                |                                   |
|----------------|-----------------------------------|
| WP_067089782.1 | Methanobrevibacter curvatus       |
| WP_067258381.1 | Methanobrevibacter cuticularis    |
| WP_066973840.1 | Methanobrevibacter filiformis     |
| WP_083495826.1 | Methanobrevibacter millerae       |
| WP_081477291.1 | Methanocella arvoryzae            |
| WP_011500268.1 | Methanococcoides burtonii         |
| WP_011498660.1 | Methanococcoides burtonii         |
| WP_048193743.1 | Methanococcoides methylutens      |
| WP_048204675.1 | Methanococcoides methylutens      |
| WP_048194737.1 | Methanococcoides methylutens      |
| WP_048205523.1 | Methanococcoides methylutens      |
| WP_011971960.1 | Methanococcus vannielii           |
| WP_074370700.1 | Methanoculleus chikugoensis       |
| WP_048180103.1 | Methanoculleus sediminis          |
| WP_083475320.1 | Methanogenium cariaci             |
| WP_072560411.1 | Methanohalophilus halophilus      |
| WP_013036951.1 | Methanohalophilus mahii           |
| WP_072359189.1 | Methanohalophilus portucalensis   |
| WP_023846582.1 | Methanolobus tindarius            |
| WP_023846254.1 | Methanolobus tindarius            |
| WP_019177401.1 | Methanomassiliicoccus luminyensis |
| WP_081579869.1 | Methanomassiliicoccus luminyensis |
| WP_015324563.1 | Methanomethylovorans hollandica   |
| WP_012107888.1 | Methanoregula boonei              |
| WP_013718431.1 | Methanosaeta concilii             |
| WP_014586911.1 | Methanosaeta harundinacea         |
| WP_048155293.1 | Methanosarcina                    |
| WP_048128957.1 | Methanosarcina                    |
| WP_048140578.1 | Methanosarcina                    |
| WP_011021023.1 | Methanosarcina acetivorans        |
| WP_011021684.1 | Methanosarcina acetivorans        |
| WP_011307268.1 | Methanosarcina barkeri            |
| WP_048118106.1 | Methanosarcina barkeri            |
| WP_048107164.1 | Methanosarcina barkeri            |
| WP_048103491.1 | Methanosarcina barkeri            |
| WP_011308483.1 | Methanosarcina barkeri            |
| WP_080943665.1 | Methanosarcina barkeri            |
| WP_054297746.1 | Methanosarcina flavescens         |
| WP_048139517.1 | Methanosarcina horonobensis       |
| WP_048126757.1 | Methanosarcina lacustris          |
| WP_048126054.1 | Methanosarcina lacustris          |
| WP_048045253.1 | Methanosarcina mazei              |
| WP_048040775.1 | Methanosarcina mazei              |
| WP_048037902.1 | Methanosarcina mazei              |
| WP_011034932.1 | Methanosarcina mazei              |
| WP_048039071.1 | Methanosarcina mazei              |
| WP_048046450.1 | Methanosarcina mazei              |

|                |                                     |
|----------------|-------------------------------------|
| WP_048048029.1 | Methanosarcina mazei                |
| WP_048041442.1 | Methanosarcina mazei                |
| WP_048170480.1 | Methanosarcina siciliae             |
| WP_048051731.1 | Methanosarcina soligelidi           |
| WP_048160643.1 | Methanosarcina sp 1HA22             |
| WP_048135064.1 | Methanosarcina sp 1HT1A1            |
| WP_082106041.1 | Methanosarcina sp 1HT1A1            |
| WP_048172530.1 | Methanosarcina sp 2HA1B4            |
| WP_048157694.1 | Methanosarcina sp Kolksee           |
| WP_048158242.1 | Methanosarcina sp Kolksee           |
| WP_048178702.1 | Methanosarcina sp MTP4              |
| WP_082090559.1 | Methanosarcina sp MTP4              |
| WP_048166474.1 | Methanosarcina thermophila          |
| WP_048122560.1 | Methanosarcina vacuolata            |
| WP_048123830.1 | Methanosarcina vacuolata            |
| WP_012617838.1 | Methanosphaerula palustris          |
| WP_012617934.1 | Methanosphaerula palustris          |
| WP_012618116.1 | Methanosphaerula palustris          |
| WP_012619089.1 | Methanosphaerula palustris          |
| WP_048901179.1 | Methanothermobacter marburgensis    |
| WP_048176473.1 | Methanothermobacter sp CaT2         |
| WP_048060766.1 | Methanothermobacter thermotrophicus |
| WP_074358693.1 | Methanothermobacter wolfeii         |
| WP_006166289.1 | Natrialba chahannaensis             |
| WP_086887728.1 | Natrialbaeae archaeon JW/NM-HA 15   |
| WP_008456977.1 | Natrinema                           |
| WP_007107636.1 | Natrinema altunense                 |
| WP_006187219.1 | Natrinema pallidum                  |
| WP_006182629.1 | Natrinema pellirubrum               |
| WP_006429052.1 | Natrinema versiforme                |
| WP_005580564.1 | Natronobacterium gregoryi           |
| WP_005557478.1 | Natronococcus amylolyticus          |
| WP_005554376.1 | Natronococcus amylolyticus          |
| WP_049893246.1 | Natronococcus jeotgali              |
| WP_015319633.1 | Natronococcus occultus              |
| WP_054863213.1 | Natronolimnobius baerhuensis        |
| WP_007259150.1 | Natronolimnobius innermongolicus    |
| WP_006065050.1 | Natronorubrum bangense              |
| WP_008160831.1 | Natronorubrum sulfidifaciens        |
| WP_076609781.1 | Natronorubrum thiooxidans           |
| WP_006087814.1 | Natronorubrum tibetense             |
| WP_014963490.1 | Nitrosopumilus                      |
| WP_014964456.1 | Nitrosopumilus                      |
| WP_075054790.1 | Nitrososphaera viennensis           |
| WP_048147879.1 | Palaeococcus ferrophilus            |
| WP_048059454.1 | Picrophilus                         |
| WP_058371553.1 | Pyrodictium occultum                |

|                |                            |
|----------------|----------------------------|
| WP_054839292.1 | Sulfolobus metallicus      |
| WP_054846334.1 | Sulfolobus sp JCM 16833    |
| WP_048196951.1 | Thaumarchaeota archaeon N4 |
| WP_010900511.1 | Thermoplasma acidophilum   |
| WP_010916426.1 | Thermoplasma volcanium     |
| WP_069807158.1 | Vulcanisaeta thermophila   |

**Supplementary Table S3: BEAST model test table.**

| Molecular Clock model, Population Growth model                               | Posterior |     | Likelihood |      | Rank |
|------------------------------------------------------------------------------|-----------|-----|------------|------|------|
|                                                                              | Mean      | ESS | Mean       | ESS  |      |
| UCLN, Constant                                                               | -7174.65  | 297 | -4207.746  | 1099 | 1    |
| UCLN, Exponential                                                            | -7162.1   | 312 | -4208.649  | 570  | 2    |
| UCLN, BSKY (Rejected due to low ESS)                                         | -9564.1   | 58  | -4196.684  | 408  | 3    |
| Strict, BSKY (Rejected due to low ESS)                                       | -8037.16  | 88  | -4236.615  | 398  | 4    |
| Strict, Constant (Rejected due to low ESS)                                   | -5673.29  | 143 | -4301.066  | 566  | 5    |
| Strict, Exponential (Rejected due to higher posterior and likelihood values) | -5648.28  | 279 | -4306.91   | 1047 | 6    |

UCLN = uncorrelated log-normal clock

BSKY = Bayesian skyline

ESS = Estimated sample size
